# Supplementary material for: Short-chain fatty acids activate acetyltransferase p300
Source: eLife journal article supplement (doi:10.7554/elife.72171), 2021-10-22
Supplement: supp [file elife-72171-supp-v1.zip]

Archive with 8 entries (8 files):
- elife_poa_e72171_Source_data_1.xlsx
- elife_poa_e72171_Transparent_Reporting_File.pdf
- elife_poa_e72171_Source_Data_2.zip
- elife_poa_e72171_Figure_1_figure_supplement_1.pdf
- elife_poa_e72171_Figure_2_figure_supplement_1.pdf
- elife_poa_e72171_Figure_2_figure_supplement_2.pdf
- elife_poa_e72171_Figure_3_figure_supplement_1.pdf
- elife_poa_e72171_Figure_4_figure_supplement_1.pdf
