# Supplementary material for: Short-chain fatty acids activate acetyltransferase p300
Source: eLife journal article supplement (doi:10.7554/elife.72171), 2021-10-22
Supplement: supp [file elife-72171-supp-v1.zip › elife_poa_e72171_Source_data_1.xlsx]

## Sheet: Antibodies
Antibody	Vendor	Catalog Number
ACLY	CST	4332S
ACSS2	Novus Biologicals	NBP2-01269
FFAR2/GPR43	Novus Biologicals	MAB10082-100
FFAR3/GPR41	Novus Biologicals	NBP2-14014
H3	Abcam	ab24834
H3 K18ac	Abcam	ab1191
H3 K27ac	Active Motif	39685
HA-Tag	CST	3724S
p300 (NM11)	SCBT	sc-32244
p53	CST	2524T
p53 K382ac	CST	2525S
Pan anti-acetyllysine	CST	9814S
Pan anti-butyryllysine	PTM Biolabs	PTM-329
Pan anti-propionyllysine	PTM Biolabs	PTM-201

## Sheet: SCFA Cytotoxicity
		SCFA1		SCFA2		SCFA3		% Viability vs. Untreated		% Viability vs. Max
		% Viability vs. Untreated	% Viability vs. Max Growth	% Viability vs. Untreated	% Viability vs. Max Growth	% Viability vs. Untreated	% Viability vs. Max Growth	Average	Stdev	Average	Stdev
Acetate	100	0.727243	0.640906	0.715155	0.600386	0.717791	0.62427	0.720063	0.00518999	0.621854	0.0166303
	50	1.01798	0.897125	0.978302	0.821303	1.11416	0.969	1.03681	0.0570424	0.895809	0.0603043
	10	1.12739	0.993548	1.19116	1	1.14981	1	1.15612	0.0264133	0.997849	0.00304154
	1	1.13471	1	1.01555	0.852571	1.13659	0.988503	1.09562	0.0566222	0.947025	0.0669537
	0.1	1.02912	0.906947	1.03846	0.871808	0.98813	0.859387	1.01857	0.0218602	0.879381	0.0201409
	0.01	0.943138	0.831171	1.12897	0.947793	0.908606	0.790225	0.993572	0.096774	0.856396	0.066754
Butyrate	100	0.396242	0.349201	0.478572	0.401771	0.539156	0.46891	0.471323	0.0585693	0.406627	0.0489916
	50	0.384284	0.338662	0.401176	0.336795	0.500744	0.435502	0.428735	0.0513832	0.37032	0.0460973
	10	0.366306	0.322819	0.408476	0.342924	0.509949	0.443508	0.428244	0.0602849	0.36975	0.0527966
	1	0.897259	0.790738	0.817899	0.686642	0.990483	0.861434	0.90188	0.070533	0.779604	0.0717915
	0.1	1.03888	0.91555	1.03589	0.869652	1.12254	0.976284	1.06577	0.0401588	0.920495	0.0436726
	0.01	0.961441	0.847301	1.00892	0.847009	0.95657	0.831939	0.975645	0.0236149	0.842083	0.00717402
Propionate	100	0.4976	0.438526	0.499121	0.419022	0.541856	0.471257	0.512859	0.020513	0.442935	0.0215519
	50	0.498576	0.439386	0.444775	0.373397	0.591688	0.514597	0.51168	0.0606884	0.44246	0.0576857
	10	0.67632	0.596028	0.683858	0.574112	0.828944	0.720941	0.729707	0.0702384	0.630361	0.0646723
	1	0.999919	0.88121	0.89854	0.754341	1.03243	0.897911	0.976961	0.0570182	0.844488	0.0641067
	0.1	0.870495	0.767152	0.866027	0.727046	0.898709	0.781617	0.87841	0.0144689	0.758605	0.0230837
	0.01	0.893923	0.787798	0.9806	0.823232	0.873239	0.759465	0.915921	0.0465081	0.790165	0.0260865
Untreated		1	0.881282	1	0.839519	1	0.86971	1	0	0.863504	0.0176055

## Sheet: Media Glucose Concentrations
	1	2	3	4	5	6	7	8	9	10	11	12
A	0.635	0.6205	0.52625	0.59275	0.5105	0.61175	0.63475	0.574	0.43975	0.43075	0.46775	0.421
B	0.5525	0.68475	0.65525	0.69325	0.6995	0.526	0.56575	0.633	0.43925	0.45	0.598	0.5225
C	0.59075	0.5875	0.576	0.55725	0.4135	0.5025	0.5475	0.58475	0.4575	0.4165	0.55675	0.44375
D	0.255	0.604	0.5475	0.57625	0.626	0.63225	0.60475	0.659	0.486	0.5025	0.558	0.52725
E	0.34025	0.51425	0.63325	0.585	0.6105	0.60225	0.60375	0.5895	0.57575	0.4685	0.5225	0.5125
F	0.47925	0.514	0.6015	0.91825	0.81825	0.70625	0.5115	0.6565	0.6355	0.387	0.78075	0.84825
G	0.78325	0.834	0.85175	1.11525	1.09825	1.056	0.99925	1.0075	0.97675	0.74525	0.76625	0.712
H	0.5085	0.52	0.53775	0.29225	0.279	0.2825	0.16075	0.159	0.16275	0.04325	0.044	0.04325
Std Concentrations (ug/mL)	0	10	20	40	60	80	100		m	84.673
Standards	0.0435	0.160833	0.284583	0.522083	0.741167	0.9945	1.08983		b	-3.7614
Protein	Untreated (0)	Acetate (0)	Butyrate (0)	Propionate(0)	Glucose (0)	Untreated (4)	Acetate (4)	Butyrate (4)	Propionate(4)	Glucose (4)	Untreated (8)	Acetate (8)	Butyrate (8)	Propionate(8)	Glucose (8)	Untreated (12)	Acetate (12)	Butyrate (12)	Propionate(12)	Glucose (12)	Untreated (24)	Acetate (24)	Butyrate (24)	Propionate(24)	Glucose (24)
Protein Measurement (ug/mL)	0.593917	0.571667	0.5495	0.439833	0.531583	0.630833	0.639583	0.546	0.5235	0.81425	0.58475	0.491083	0.529917	0.472333	0.601167	0.468833	0.6115	0.58325	0.52925	0.672	0.495917	0.59925	0.589667	0.501167	0.823
Concentration (ug/mL) (dilution not taken into account)	46.5273	44.6433	42.7664	33.4806	41.2494	49.6532	50.394	42.4701	40.5649	65.1836	45.7511	37.8201	41.1082	36.2325	47.1412	35.9361	48.0161	45.6241	41.0518	53.1389	38.2294	46.9789	46.1674	38.6739	65.9245
Dilution Corrected	930.546	892.867	855.328	669.612	2062.47	993.063	1007.88	849.401	811.298	3259.18	915.023	756.402	822.165	724.65	2357.06	718.722	960.323	912.483	821.036	2656.94	764.587	939.578	923.349	773.478	3296.22
Concentration mM	5.1697	4.96037	4.75182	3.72007	11.4582	5.51702	5.59934	4.7189	4.50721	18.1066	5.08346	4.20223	4.56758	4.02583	13.0948	3.9929	5.33513	5.06935	4.56131	14.7608	4.24771	5.21988	5.12972	4.2971	18.3124
Average	Untreated	Acetate	Butyrate	Propionate
0	5.1697	4.96037	4.75182	3.72007
4	5.51702	5.59934	4.7189	4.50721
8	5.08346	4.20223	4.56758	4.02583
12	3.9929	5.33513	5.06935	4.56131
24	4.24771	5.21988	5.12972	4.2971
Stdev	Untreated	Acetate	Butyrate	Propionate
0	0.0356538	0.0045277	0.348561	0.228479
4	0.115358	0.338065	0.33774	0.150551
8	0.3584	0.139388	0.0846172	0.153322
12	1.02106	0.182206	0.261753	0.204352
24	0.714024	0.317979	0.310384	0.197249

## Sheet: SCFA Media pH
Rep 1	Untreated	Acetate	Butyrate	Propionate	Glucose		Rep 2	Untreated	Acetate	Butyrate	Propionate	Glucose
0 hour	7.71	7.81	7.77	7.81	7.79		0 hour	8.4
4 hour	7.5	7.6	7.72	7.59	7.58		30 minutes	7.93	7.81	7.81	7.85	7.81
8 hour	7.58	7.52	7.64	7.49	7.56		1 hour	7.87	7.88	7.85	7.86	7.91
12 hour	7.89	7.76	7.81	7.76	7.82		2 hours	7.74	7.81	7.81	7.81	7.76
24 hour	7.75	7.7	7.73	7.69	7.8		4 hours	7.63	7.69	7.75	7.63	7.64

## Sheet: PCC Activity Assays
	Time	Area	% Area
mm 1 uM	14.299	37960	100
mm 10 uM	12.992	134989	100
mm 20 uM	12.738	195438	100
mm 40 uM	12.498	368527	100
mm 80 uM	12.243	695511	100
pp 1 uM	15.054	25625	100
pp 10 uM	14.628	114913	100
pp 20 uM	14.483	205708	100
pp 40 uM	14.323	405954	100
pp 80 uM	14.236	561686	100
10+	13.004	9419	0.78		KO 1	9419
	13.905	1198066	99.22		KO 2	5228
11+	12.327	31318	8.275		WT 1	31318
	14.209	347142	91.725		WT 2	119272
23+	13.31	5228	1.512
	14.226	340517	98.488
26+	12.114	119272	15.579
	14.095	646300	84.421
371+	13.417	4067	1.653
	14.351	241952	98.347
405+	12.323	9357	1.327
	14.118	695764	98.673
10-	13.58	3655839	100
11-	14.009	1230252	100

## Sheet: HDAC Assays
Kinetic read	pos control	neg control	inhibitor control	Butyrate	Butyrate	Butyrate	Butyrate	Butyrate	Prop.	Prop.	Prop.	Prop.	Prop.	But-coA	But-coA	But-coA	But-coA	Prop-coA	Prop-coA	Prop-coA	Prop-coA
Con. (mM)			2 uM	10	1	0.1	0.01	0.001	10	1	0.1	0.01	0.001	1	0.1	0.01	0.001	1	0.1	0.01	0.001
00:00:00	890	1032.5	941.5	910.5	1090	1054.5	1100.5	1394	1115	1100	1183.5	1161	1105	1159.5	1282.5	1361.5	1374.5	1198	1329.5	1459.5	1448.5
00:02:00	924.5	1081.5	1072.5	1055.5	1285	1278	1445.5	1725	1315.5	1345.5	1488.5	1557	1487	1477	1692	1826	1852	1590	1773.5	1962	1954
00:04:00	1016.5	1073.5	1183.5	1205	1480	1520	1947	2323	1521.5	1608.5	1872.5	2137.5	2043	1888.5	2256.5	2480.5	2549	2145.5	2341.5	2691.5	2698.5
00:06:00	1156	1063.5	1301.5	1368	1691.5	1801	2623	3164.5	1716	1902.5	2344.5	2907.5	2805.5	2389.5	2953	3337	3461.5	2858.5	3125	3653.5	3685.5
00:08:00	1347	1072.5	1426.5	1537.5	1920.5	2127	3474.5	4024.5	1942.5	2225.5	2904.5	3857	3735.5	2964	3704	4365	4577	3701	4061.5	4796	4886.5
00:10:00	1600	1133	1548.5	1703	2159	2493.5	4462	5202.5	2147.5	2572	3558.5	4949.5	4810.5	3590	4594	5539.5	5839.5	4630	5124.5	6074.5	6242
00:12:00	1906	1178.5	1668.5	1863	2400.5	2891.5	5537.5	6520	2373	2941.5	4274.5	6133.5	5962	4253.5	5575	6799	7208	5642.5	6264.5	7316	7668
00:14:00	2259	1205.5	1785	2022.5	2643.5	3319	6676.5	7646	2601.5	3323	5039	7373.5	7159.5	4957.5	6590.5	8140.5	8649.5	6699	7455.5	8590.5	9182
00:16:00	2654	1216.5	1894.5	2169.5	2889	3768.5	7847.5	9022	2803.5	3718	5718.5	8640	8363	5656	7644.5	9495.5	10089	7765.5	8656.5	9936.5	10661
00:18:00	3080.5	1224.5	1995	2316	3131	4223	9019.5	10246.5	2994.5	4122	6519.5	9868	9549.5	6357.5	8707.5	10821	11498.5	8817	9864.5	11274.5	12047
00:20:00	3538.5	1224.5	2098.5	2453.5	3374	4699.5	10178.5	11693	3199	4523.5	7337	11083.5	10707.5	7058	9777	12137.5	12844	9877	11065	12594	13093.5
00:22:00	4022.5	1223.5	2190.5	2585	3613	5182.5	11306.5	12724	3383	4930.5	8130	12255.5	11810.5	7753.5	10823.5	13349	14045	10914	12230.5	13894	14308.5
00:24:00	4523	1220.5	2273.5	2712	3842.5	5667.5	12396	13978	3566	5343.5	8765.5	13381	12869.5	8442	11862.5	14145.5	14802.5	11890	13354.5	15079.5	15568.5
00:26:00	5041.5	1213	2357.5	2826	4080.5	6167.5	13456.5	15018.5	3720.5	5755.5	9533.5	14415	13863	9123.5	12811	15205	15450.5	12862.5	14449.5	16248.5	16633
00:28:00	5567.5	1210	2439	2947.5	4312	6654	14445	16160.5	3883	6170.5	10334	15099	14822.5	9783.5	13779.5	16198.5	16426.5	13818	15497.5	17270.5	17637
00:30:00	6101.5	1206.5	2505	3050	4539.5	7146	15396.5	16999	4050.5	6587.5	11120.5	15904	15692.5	10408.5	14744.5	16768	17362.5	14696	16523	17772.5	17993
00:32:00	6646.5	1198.5	2581.5	3153.5	4767.5	7636	16309.5	18055.5	4208	6982.5	11865.5	16757	16532.5	11024	15663	17627	18239	15557	17440.5	18658	18883.5
00:34:00	7203	1194	2646	3249.5	4977.5	8134.5	17120.5	18753	4359	7386	12604	17522.5	17334.5	11627.5	16490.5	18474	19089.5	16316	18362	19488.5	19705.5
00:36:00	7771	1191.5	2710	3346.5	5191.5	8601	17927	19684	4485	7811	13329	18276.5	18022	12232	17334.5	19292	19900	17146.5	19198.5	20351	20489
00:38:00	8317.5	1188	2768.5	3435	5414	9087	18703.5	20307	4640	8196	14026	18959	18731.5	12802.5	18115	20037.5	20630	17854.5	20013.5	21121	21204
00:40:00	8874	1183	2824.5	3519	5623.5	9546	19386	21062.5	4763.5	8590	14707	19599	19353	13361	18895	20798.5	21356	18559.5	20770	21840.5	21945.5
00:42:00	9422.5	1179	2872	3600.5	5827	10012	20064.5	21676	4909	8971	15363	20229.5	19984	13892	19629.5	21482	22008	19235	21486	22568	22620.5
00:44:00	9980	1176	2926	3676.5	6030.5	10490	20688	22360	5029.5	9368	16030.5	20801.5	20557.5	14421.5	20330	22142.5	22654.5	19849	22131	23179	23222.5
00:46:00	10530	1173.5	2973.5	3758	6240	10934.5	21278	22913.5	5161	9753	16638.5	21358.5	21101	14881	21007.5	22724.5	23246.5	20482.5	22813	23830.5	23855.5
00:48:00	11076	1168	3013	3832	6430	11381	21871.5	23439.5	5281	10122	17244.5	21880	21619.5	15385.5	21608	23352.5	23775	21074	23406	24441	24371.5
00:50:00	11615.5	1164	3060	3901.5	6635.5	11824	22365	23959	5386	10501	17811.5	22371.5	22082.5	15851.5	22273	23899	24322	21584	24023	24946	24908
00:52:00	12144	1160.5	3099.5	3969.5	6829	12260	22869.5	24615	5503.5	10865.5	18363.5	22825.5	22529.5	16325.5	22824.5	24439	24828.5	22151	24580	25443.5	25365
00:54:00	12673.5	1158.5	3143.5	4032	7022	12688	23330.5	24956.5	5614.5	11207	18926	23253.5	22975.5	16738	23394.5	24907.5	25311.5	22593	25076.5	26006.5	25832.5
00:56:00	13173	1155.5	3172	4104.5	7203.5	13107	23782	25451	5727	11580.5	19430.5	23676.5	23344	17174	23920.5	25356.5	25685	23107.5	25506.5	26399	26262.5
00:58:00	13680	1151.5	3208	4162	7389.5	13517	24198	25791.5	5828	11933	19943.5	24004	23724	17607	24399	25800.5	26169.5	23551.5	25980.5	26859.5	26693.5
01:00:00	14190	1149.5	3243.5	4223	7593	13913	24595.5	26238	5926	12294	20418	24445	24098	17984.5	24880.5	26195	26501.5	23948.5	26495	27297.5	27117.5
	pos control	neg control	TSA (2 uM)	Butyrate (10 mM)	Butyrate (1 mM)	Butyrate (0.1 mM)	Butyrate (0.01 mM)	Butyrate (0.001 mM)	Prop. (10 mM)	Prop. (1 mM)	Prop. (0.1 mM)	Prop. (0.01 mM)	Prop. (0.001 mM)	But-coA (1 mM)	But-coA (0.1 mM)	But-coA (0.01 mM)	But-coA (0.001 mM)	Prop-coA (1 mM)	Prop-coA (0.1 mM)	Prop-coA (0.01 mM)	Prop-coA (0.001 mM)
m	296405	5896.15	69977	97553	167480	316274	723641	784814	135783	276982	511522	734695	725854	464764	680055	764145	785225	676264	761563	803837	810152
				10	1	0.1	0.01	0.001

## Sheet: Flourometric HAT Assays
Kinetic read	pos control	p300 inhibitor	neg control	Butyrate	Butyrate	Butyrate	Butyrate	Butyrate	But+p300	Prop.	Prop.	Prop.	Prop.	Prop.	Pro+p300	But-coA	But-coA	But-coA	But-coA	BcoA + p300	Prop-coA	Prop-coA	Prop-coA	Prop-coA	PcoA + p300	Differences
Con. (mM)		0.001		10	1	0.1	0.01	0.001	1	10	1	0.1	0.01	0.001	1	1	0.1	0.01	0.001	1	1	0.1	0.01	0.001	1
Time	pos control	p300 inhibitor (1 uM)	neg control	Butyrate (10 mM)	Butyrate (1 mM)	Butyrate (0.1 mM)	Butyrate (0.01 mM)	Butyrate (0.001 mM)	But+p300 (1 mM)	Prop. (10 mM)	Prop. (1 mM)	Prop. (0.1 mM)	Prop. (0.01 mM)	Prop. (0.001 mM)	Pro+p300 (1 mM)	But-coA (1 mM)	But-coA (0.1 mM)	But-coA (0.01 mM)	But-coA (0.001 mM)	BcoA + p300 (1 mM)	Prop-coA (1 mM)	Prop-coA (0.1 mM)	Prop-coA (0.01 mM)	Prop-coA (0.001 mM)	PcoA + p300 (1 mM)
00:00:00	0.3	0.292	0.302	0.2965	0.293	0.292	0.286	0.207	0.286	0.2895	0.2835	0.2925	0.29	0.217	0.29	0.2835	0.286	0.318	0.285	0.2845	0.3145	0.2895	0.28	0.2955	0.297	-0.0142545
00:02:00	0.312	0.296	0.314	0.317	0.295	0.292	0.297	0.206	0.293	0.318	0.305	0.293	0.293	0.212	0.296	0.305	0.296	0.286	0.288	0.294	0.363	0.324	0.302	0.306	0.305	-0.0569348
00:04:00	0.333	0.32	0.335	0.328	0.312	0.301	0.312	0.21	0.32	0.341	0.337	0.303	0.303	0.218	0.305	0.357	0.326	0.302	0.299	0.335	0.388	0.363	0.315	0.326	0.334	-0.0876247
00:06:00	0.371	0.345	0.352	0.346	0.339	0.326	0.336	0.219	0.358	0.378	0.388	0.335	0.327	0.22	0.32	0.428	0.361	0.324	0.315	0.395	0.437	0.4	0.349	0.351	0.38	-0.130612
00:08:00	0.3995	0.373	0.372	0.367	0.373	0.35	0.362	0.225	0.397	0.42	0.445	0.354	0.349	0.23	0.344	0.497	0.395	0.348	0.347	0.462	0.522	0.445	0.392	0.377	0.431	-0.169508
00:10:00	0.4355	0.396	0.385	0.393	0.419	0.365	0.386	0.234	0.423	0.454	0.493	0.377	0.38	0.233	0.377	0.575	0.424	0.369	0.373	0.531	0.599	0.498	0.439	0.403	0.488	-0.204344
00:12:00	0.463	0.423	0.403	0.419	0.458	0.387	0.412	0.245	0.44	0.5	0.527	0.409	0.404	0.236	0.418	0.637	0.457	0.392	0.403	0.599	0.673	0.558	0.486	0.428	0.536	-0.223762
00:14:00	0.4835	0.441	0.421	0.457	0.476	0.415	0.439	0.253	0.454	0.537	0.548	0.469	0.431	0.244	0.458	0.689	0.494	0.419	0.423	0.663	0.727	0.614	0.521	0.45	0.584	-0.237276
00:16:00	0.505	0.463	0.439	0.498	0.494	0.44	0.462	0.261	0.472	0.568	0.565	0.509	0.451	0.247	0.487	0.734	0.531	0.439	0.442	0.715	0.773	0.664	0.555	0.471	0.626	-0.245532
00:18:00	0.527	0.479	0.465	0.521	0.502	0.463	0.476	0.265	0.486	0.589	0.581	0.535	0.476	0.251	0.517	0.77	0.569	0.457	0.457	0.758	0.802	0.712	0.583	0.487	0.666	-0.249735
00:20:00	0.5485	0.502	0.481	0.545	0.515	0.484	0.49	0.269	0.495	0.611	0.593	0.558	0.495	0.253	0.531	0.8	0.605	0.473	0.477	0.797	0.841	0.76	0.603	0.507	0.707	-0.250356
00:22:00	0.569	0.518	0.508	0.562	0.528	0.504	0.501	0.272	0.51	0.627	0.61	0.577	0.511	0.26	0.549	0.831	0.633	0.491	0.497	0.827	0.878	0.807	0.623	0.52	0.742	-0.253793
00:24:00	0.5825	0.536	0.529	0.572	0.535	0.52	0.511	0.278	0.524	0.633	0.618	0.594	0.526	0.266	0.556	0.855	0.663	0.508	0.517	0.854	0.909	0.851	0.635	0.54	0.773	-0.250507
00:26:00	0.5935	0.552	0.55	0.578	0.551	0.534	0.524	0.282	0.539	0.645	0.631	0.608	0.535	0.272	0.567	0.878	0.692	0.525	0.532	0.876	0.93	0.896	0.653	0.556	0.809	-0.248536
00:28:00	0.609	0.566	0.567	0.591	0.568	0.552	0.532	0.285	0.548	0.65	0.635	0.608	0.556	0.28	0.578	0.899	0.722	0.536	0.543	0.896	0.95	0.928	0.676	0.571	0.841	-0.248029
00:30:00	0.621	0.587	0.579	0.608	0.578	0.568	0.543	0.293	0.566	0.645	0.659	0.619	0.564	0.289	0.582	0.923	0.748	0.547	0.555	0.916	0.978	0.963	0.691	0.581	0.869	-0.251818
00:32:00	0.635	0.6	0.588	0.621	0.592	0.581	0.554	0.302	0.577	0.663	0.67	0.618	0.578	0.293	0.596	0.937	0.772	0.56	0.571	0.939	0.998	0.998	0.705	0.593	0.902	-0.248631
00:34:00	0.644	0.612	0.602	0.637	0.599	0.591	0.565	0.311	0.592	0.674	0.677	0.632	0.593	0.3	0.607	0.948	0.795	0.57	0.584	0.959	1.027	1.03	0.718	0.601	0.926	-0.249634
00:36:00	0.654	0.62	0.608	0.654	0.612	0.6	0.575	0.317	0.601	0.673	0.684	0.644	0.606	0.308	0.617	0.965	0.821	0.585	0.598	0.978	1.046	1.049	0.741	0.617	0.955	-0.246386
00:38:00	0.662	0.63	0.612	0.669	0.622	0.608	0.589	0.324	0.611	0.685	0.706	0.66	0.618	0.316	0.622	0.975	0.846	0.598	0.607	0.992	1.083	1.081	0.762	0.629	0.974	-0.248902
00:40:00	0.679	0.639	0.623	0.677	0.627	0.62	0.601	0.333	0.622	0.694	0.719	0.667	0.631	0.324	0.638	0.985	0.864	0.604	0.607	1.006	1.091	1.109	0.768	0.636	0.995	-0.25045
00:42:00	0.691	0.649	0.63	0.689	0.636	0.63	0.614	0.343	0.629	0.706	0.724	0.676	0.644	0.331	0.647	1.002	0.882	0.617	0.622	1.018	1.096	1.129	0.782	0.65	1.019	-0.244716
00:44:00	0.704	0.666	0.639	0.701	0.64	0.641	0.625	0.352	0.64	0.717	0.731	0.683	0.658	0.337	0.657	1.011	0.903	0.629	0.632	1.032	1.122	1.157	0.79	0.66	1.029	-0.244967
00:46:00	0.712	0.677	0.646	0.707	0.657	0.653	0.639	0.361	0.649	0.719	0.739	0.688	0.665	0.345	0.672	1.017	0.914	0.64	0.645	1.039	1.139	1.182	0.808	0.672	1.044	-0.240848
00:48:00	0.718	0.686	0.651	0.719	0.665	0.668	0.65	0.369	0.659	0.73	0.742	0.7	0.676	0.353	0.687	1.02	0.932	0.647	0.651	1.047	1.137	1.204	0.823	0.679	1.059	-0.236514
00:50:00	0.726	0.7	0.665	0.725	0.666	0.672	0.666	0.374	0.669	0.725	0.759	0.714	0.682	0.365	0.691	1.026	0.948	0.653	0.666	1.049	1.16	1.218	0.834	0.691	1.068	-0.233071
00:52:00	0.731	0.709	0.672	0.737	0.677	0.678	0.676	0.38	0.679	0.739	0.753	0.719	0.69	0.373	0.696	1.036	0.968	0.667	0.678	1.055	1.163	1.23	0.842	0.708	1.076	-0.226027
00:54:00	0.742	0.717	0.683	0.749	0.684	0.694	0.691	0.391	0.689	0.752	0.765	0.729	0.695	0.377	0.698	1.037	0.98	0.676	0.686	1.064	1.185	1.248	0.856	0.713	1.088	-0.226199
00:56:00	0.7495	0.73	0.69	0.755	0.698	0.702	0.701	0.397	0.703	0.756	0.769	0.738	0.702	0.384	0.709	1.041	0.989	0.687	0.7	1.072	1.193	1.264	0.863	0.721	1.096	-0.221234
00:58:00	0.758	0.74	0.7	0.759	0.705	0.71	0.716	0.405	0.713	0.77	0.777	0.751	0.716	0.393	0.716	1.045	1.003	0.699	0.705	1.079	1.188	1.273	0.871	0.735	1.106	-0.214928
01:00:00	0.769	0.75	0.71	0.765	0.711	0.714	0.72	0.42	0.72	0.769	0.782	0.754	0.721	0.399	0.721	1.051	1.017	0.713	0.717	1.083	1.2	1.284	0.881	0.738	1.115	-0.213652
01:02:00	0.7745	0.762	0.718	0.772	0.719	0.723	0.726	0.426	0.727	0.778	0.79	0.763	0.733	0.408	0.737	1.063	1.03	0.721	0.727	1.09	1.2	1.295	0.891	0.746	1.121	-0.210504
01:04:00	0.7845	0.772	0.727	0.779	0.725	0.734	0.735	0.434	0.737	0.792	0.8	0.771	0.747	0.418	0.745	1.062	1.042	0.73	0.732	1.099	1.211	1.308	0.904	0.753	1.125	-0.208572
01:06:00	0.794	0.776	0.737	0.792	0.728	0.742	0.747	0.44	0.742	0.798	0.803	0.778	0.753	0.426	0.753	1.068	1.061	0.743	0.739	1.1	1.212	1.315	0.922	0.766	1.13	-0.203775
01:08:00	0.8035	0.778	0.744	0.791	0.735	0.743	0.756	0.449	0.758	0.806	0.812	0.783	0.761	0.435	0.755	1.073	1.078	0.753	0.746	1.106	1.201	1.325	0.926	0.772	1.141	-0.198602
01:10:00	0.8145	0.782	0.754	0.798	0.747	0.753	0.765	0.455	0.768	0.818	0.823	0.797	0.767	0.443	0.76	1.08	1.092	0.765	0.749	1.11	1.208	1.333	0.946	0.784	1.149	-0.196912
01:12:00	0.821	0.794	0.762	0.803	0.757	0.761	0.773	0.465	0.778	0.829	0.834	0.809	0.773	0.448	0.766	1.084	1.101	0.775	0.761	1.111	1.213	1.34	0.951	0.796	1.152	-0.191317
01:14:00	0.827	0.812	0.77	0.809	0.77	0.768	0.777	0.472	0.788	0.835	0.842	0.818	0.784	0.456	0.774	1.083	1.112	0.792	0.768	1.115	1.226	1.344	0.961	0.801	1.161	-0.189924
01:16:00	0.831	0.819	0.776	0.824	0.774	0.777	0.785	0.48	0.793	0.844	0.853	0.821	0.792	0.464	0.787	1.09	1.116	0.795	0.776	1.118	1.223	1.353	0.974	0.804	1.161	-0.187492
01:18:00	0.841	0.826	0.785	0.831	0.784	0.779	0.79	0.488	0.799	0.842	0.86	0.831	0.798	0.474	0.795	1.092	1.128	0.802	0.782	1.117	1.242	1.367	0.985	0.816	1.168	-0.186209
01:20:00	0.848	0.84	0.792	0.842	0.788	0.792	0.797	0.496	0.801	0.852	0.863	0.833	0.808	0.486	0.802	1.092	1.136	0.809	0.793	1.123	1.233	1.375	0.996	0.824	1.175	-0.178727
01:22:00	0.856	0.841	0.8	0.847	0.791	0.793	0.804	0.502	0.811	0.857	0.876	0.835	0.814	0.49	0.814	1.095	1.147	0.816	0.805	1.126	1.231	1.385	1.005	0.831	1.176	-0.173309
01:24:00	0.869	0.847	0.805	0.856	0.798	0.8	0.81	0.509	0.818	0.864	0.88	0.848	0.823	0.495	0.82	1.093	1.154	0.823	0.816	1.129	1.245	1.393	1.017	0.838	1.178	-0.170247
01:26:00	0.874	0.856	0.818	0.865	0.81	0.807	0.822	0.518	0.826	0.877	0.895	0.852	0.831	0.502	0.821	1.104	1.163	0.831	0.822	1.127	1.238	1.396	1.024	0.846	1.18	-0.167259
01:28:00	0.8835	0.858	0.826	0.875	0.82	0.812	0.831	0.524	0.836	0.882	0.905	0.857	0.834	0.511	0.834	1.103	1.174	0.84	0.831	1.129	1.235	1.396	1.032	0.854	1.185	-0.161513
01:30:00	0.8945	0.861	0.835	0.885	0.821	0.818	0.845	0.53	0.842	0.888	0.914	0.864	0.846	0.517	0.84	1.107	1.179	0.853	0.841	1.137	1.25	1.4	1.03	0.867	1.183	-0.158733
01:32:00	0.899	0.871	0.844	0.888	0.83	0.828	0.857	0.539	0.851	0.89	0.915	0.873	0.86	0.523	0.846	1.112	1.183	0.865	0.847	1.131	1.257	1.408	1.039	0.87	1.189	-0.15861
01:34:00	0.906	0.875	0.851	0.895	0.843	0.839	0.862	0.545	0.854	0.893	0.92	0.876	0.863	0.531	0.855	1.113	1.187	0.877	0.853	1.135	1.251	1.412	1.046	0.873	1.192	-0.155107
01:36:00	0.914	0.882	0.858	0.899	0.855	0.844	0.871	0.557	0.857	0.902	0.922	0.882	0.872	0.536	0.859	1.116	1.198	0.885	0.862	1.132	1.25	1.423	1.052	0.882	1.195	-0.15051
01:38:00	0.9185	0.888	0.87	0.905	0.858	0.857	0.879	0.562	0.867	0.905	0.923	0.898	0.881	0.541	0.869	1.119	1.204	0.892	0.87	1.138	1.236	1.424	1.058	0.893	1.197	-0.143149
01:40:00	0.925	0.891	0.878	0.911	0.869	0.87	0.889	0.566	0.869	0.913	0.927	0.899	0.886	0.549	0.872	1.121	1.209	0.898	0.88	1.139	1.24	1.425	1.075	0.898	1.199	-0.140201
01:42:00	0.9295	0.898	0.887	0.911	0.874	0.878	0.9	0.571	0.871	0.92	0.938	0.904	0.896	0.555	0.879	1.118	1.218	0.904	0.888	1.143	1.25	1.425	1.081	0.903	1.201	-0.137913
01:44:00	0.937	0.904	0.893	0.918	0.88	0.885	0.907	0.577	0.873	0.923	0.945	0.909	0.902	0.565	0.886	1.111	1.226	0.916	0.899	1.144	1.264	1.428	1.082	0.91	1.202	-0.134153
01:46:00	0.942	0.915	0.898	0.93	0.879	0.886	0.913	0.582	0.869	0.928	0.949	0.922	0.909	0.568	0.896	1.111	1.23	0.92	0.908	1.147	1.252	1.435	1.087	0.916	1.204	-0.127763
01:48:00	0.9485	0.923	0.905	0.928	0.89	0.9	0.917	0.586	0.889	0.939	0.953	0.923	0.92	0.573	0.899	1.11	1.236	0.935	0.912	1.147	1.257	1.442	1.092	0.926	1.213	-0.124775
01:50:00	0.9545	0.93	0.911	0.931	0.898	0.911	0.924	0.59	0.896	0.945	0.961	0.931	0.924	0.581	0.911	1.113	1.242	0.944	0.921	1.147	1.262	1.447	1.099	0.933	1.214	-0.122141
01:52:00	0.9565	0.939	0.916	0.933	0.902	0.907	0.928	0.596	0.908	0.952	0.968	0.933	0.933	0.586	0.915	1.114	1.246	0.95	0.932	1.15	1.263	1.451	1.102	0.942	1.215	-0.117266
01:54:00	0.9625	0.943	0.925	0.943	0.912	0.92	0.932	0.602	0.916	0.956	0.975	0.931	0.937	0.592	0.918	1.12	1.252	0.953	0.938	1.152	1.264	1.452	1.106	0.951	1.218	-0.114872
01:56:00	0.971	0.949	0.931	0.946	0.92	0.926	0.94	0.609	0.917	0.959	0.976	0.943	0.943	0.598	0.921	1.119	1.257	0.961	0.943	1.152	1.27	1.455	1.116	0.958	1.219	-0.112695
01:58:00	0.98	0.953	0.937	0.949	0.927	0.929	0.943	0.614	0.925	0.963	0.981	0.947	0.953	0.601	0.927	1.119	1.261	0.969	0.948	1.154	1.276	1.46	1.124	0.963	1.216	-0.111262
02:00:00	0.983	0.952	0.945	0.947	0.931	0.934	0.949	0.617	0.93	0.967	0.986	0.948	0.957	0.607	0.928	1.122	1.265	0.973	0.95	1.152	1.279	1.466	1.13	0.967	1.216	-0.110963
m	5.59299	5.65986	5.9282	5.09871	5.51993	5.62844	6.32267	5.26572	5.57049	5.05131	5.12753	5.24104	5.91124	5.25224	5.37358	2.40388	7.34689	6.77465	6.16849	2.56915	2.99384	6.17763	6.62526	5.91755	3.89378

## Sheet: p300 autoacylation
total protein	Channel	Name	Signal	Total	Area	Bkgnd.		pan-acetyl	Channel	Signal	Total	Area	Bkgnd.	Normalized		Average	A	P	B
2020-10-07-autoacylation_total_protein	700	A0_1	400000	6140000	407	14100		2020-10-08-autoacetyl_new	800	405000	610000	483	424	1.0125		0	1.22617	0.959681	0.710572
2020-10-07-autoacylation_total_protein	700	A0_2	439000	5920000	407	13500		2020-10-08-autoacetyl_new	800	603000	801000	483	411	1.37358		5	1.79213	1.3255	0.845643
2020-10-07-autoacylation_total_protein	700	A0_3	695000	6120000	407	13300		2020-10-08-autoacetyl_new	800	855000	1050000	483	411	1.23022		10	2.27065	1.70236	1.23525
2020-10-07-autoacylation_total_protein	700	A0_4	697000	6050000	407	13200		2020-10-08-autoacetyl_new	800	898000	1090000	483	404	1.28838		15	2.71949	2.13251	1.69686
2020-10-07-autoacylation_total_protein	700	A5_1	586000	6450000	407	14400		2020-10-08-autoacetyl_new	800	1150000	1360000	483	426	1.96246		20	2.97335	2.57277	2.58116
2020-10-07-autoacylation_total_protein	700	A5_2	511000	6080000	407	13700		2020-10-08-autoacetyl_new	800	799000	999000	483	413	1.5636
2020-10-07-autoacylation_total_protein	700	A5_3	559000	5910000	407	13100		2020-10-08-autoacetyl_new	800	1010000	1200000	483	394	1.8068		Stdev	A	P	B
2020-10-07-autoacylation_total_protein	700	A5_4	572000	5930000	407	13200		2020-10-08-autoacetyl_new	800	1050000	1240000	483	390	1.83566		0	0.133482	0.145321	0.0279612
2020-10-07-autoacylation_total_protein	700	A10_1	542000	6280000	407	14100		2020-10-08-autoacetyl_new	800	1360000	1550000	483	413	2.50923		5	0.14435	0.0231715	0.0927503
2020-10-07-autoacylation_total_protein	700	A10_2	443000	6110000	407	13900		2020-10-08-autoacetyl_new	800	1070000	1260000	483	398	2.41535		10	0.201015	0.132581	0.11631
2020-10-07-autoacylation_total_protein	700	A10_3	464000	6070000	407	13800		2020-10-08-autoacetyl_new	800	998000	1190000	483	398	2.15086		15	0.305909	0.19253	0.237706
2020-10-07-autoacylation_total_protein	700	A10_4	558000	6160000	407	13800		2020-10-08-autoacetyl_new	800	1120000	1310000	483	396	2.00717		20	0.441073	0.354545	0.769928
2020-10-07-autoacylation_total_protein	700	A15_1	397000	6180000	407	14200		2020-10-08-autoacetyl_new	800	1150000	1350000	483	409	2.89673
2020-10-07-autoacylation_total_protein	700	A15_2	369000	5770000	407	13300		2020-10-08-autoacetyl_new	800	1110000	1280000	483	365	3.00813		Zeroed	A	P	B
2020-10-07-autoacylation_total_protein	700	A15_3	373000	5670000	407	13000		2020-10-08-autoacetyl_new	800	1030000	1200000	483	363	2.76139		0	0	0	0
2020-10-07-autoacylation_total_protein	700	A15_4	444000	5920000	407	13400		2020-10-08-autoacetyl_new	800	982000	1170000	483	384	2.21171		5	0.565962	0.365824	0.135071
2020-10-07-autoacylation_total_protein	700	A20_1	228000	6110000	407	14500		2020-10-08-autoacetyl_new	800	808000	1010000	483	426	3.54386		10	1.04448	0.742681	0.524678
2020-10-07-autoacylation_total_protein	700	A20_2	368000	5760000	407	13300		2020-10-08-autoacetyl_new	800	1100000	1290000	483	386	2.98913		15	1.49332	1.17283	0.98629
2020-10-07-autoacylation_total_protein	700	A20_3	347000	5700000	407	13200		2020-10-08-autoacetyl_new	800	1060000	1250000	483	390	3.05476		20	1.74718	1.61309	1.87058
2020-10-07-autoacylation_total_protein	700	A20_4	301000	5680000	407	13200		2020-10-08-autoacetyl_new	800	694000	881000	483	388	2.30565
2020-10-07-autoacylation_total_protein	700	P0_1	585000	5900000	407	13100		pan propionyl	800	686000	777000	437	209	1.17265
2020-10-07-autoacylation_total_protein	700	P0_2	761000	6360000	407	13800		2020-10-08-autopropionyl_new	800	662000	761000	437	228	0.869908
2020-10-07-autoacylation_total_protein	700	P0_3	742000	6540000	407	14200		2020-10-08-autopropionyl_new	800	586000	684000	437	224	0.789757
2020-10-07-autoacylation_total_protein	700	P0_4	624000	6250000	407	13800		2020-10-08-autopropionyl_new	800	628000	719000	437	207	1.00641
2020-10-07-autoacylation_total_protein	700	P5_1	561000	5970000	407	13300		2020-10-08-autopropionyl_new	800	741000	828000	437	199	1.32086
2020-10-07-autoacylation_total_protein	700	P5_2	493000	5820000	407	13100		2020-10-08-autopropionyl_new	800	636000	732000	437	220	1.29006
2020-10-07-autoacylation_total_protein	700	P5_3	501000	6010000	407	13500		2020-10-08-autopropionyl_new	800	677000	771000	437	214	1.3513
2020-10-07-autoacylation_total_protein	700	P5_4	515000	6080000	407	13700		2020-10-08-autopropionyl_new	800	690000	785000	437	216	1.33981
2020-10-07-autoacylation_total_protein	700	P10_1	478000	6050000	407	13700		2020-10-08-autopropionyl_new	800	864000	960000	437	220	1.80753
2020-10-07-autoacylation_total_protein	700	P10_2	462000	5940000	407	13400		2020-10-08-autopropionyl_new	800	713000	813000	437	230	1.54329
2020-10-07-autoacylation_total_protein	700	P10_3	432000	5910000	407	13400		2020-10-08-autopropionyl_new	800	692000	791000	437	226	1.60185
2020-10-07-autoacylation_total_protein	700	P10_4	391000	5860000	407	13400		2020-10-08-autopropionyl_new	800	726000	823000	437	222	1.85678
2020-10-07-autoacylation_total_protein	700	P15_1	431000	5840000	407	13300		2020-10-08-autopropionyl_new	800	937000	1030000	437	220	2.17401
2020-10-07-autoacylation_total_protein	700	P15_2	390000	5700000	407	13000		2020-10-08-autopropionyl_new	800	910000	1010000	437	228	2.33333
2020-10-07-autoacylation_total_protein	700	P15_3	444000	5750000	407	13000		2020-10-08-autopropionyl_new	800	806000	901000	437	218	1.81532
2020-10-07-autoacylation_total_protein	700	P15_4	352000	5750000	407	13300		2020-10-08-autopropionyl_new	800	777000	871000	437	216	2.20739
2020-10-07-autoacylation_total_protein	700	P20_1	262000	5530000	407	12900		2020-10-08-autopropionyl_new	800	798000	888000	437	207	3.0458
2020-10-07-autoacylation_total_protein	700	P20_2	267000	5540000	407	13000		2020-10-08-autopropionyl_new	800	741000	835000	437	216	2.77528
2020-10-07-autoacylation_total_protein	700	P20_3	285000	5560000	407	13000		2020-10-08-autopropionyl_new	800	657000	750000	437	214	2.30526
2020-10-07-autoacylation_total_protein	700	P20_4	261000	5460000	407	12800		2020-10-08-autopropionyl_new	800	565000	658000	437	212	2.16475
2020-10-07-autoacylation_total_protein	700	B0_1	704000	6320000	407	13800		pan-butyrylation	800	517000	1240000	407	1790	0.734375
2020-10-07-autoacylation_total_protein	700	B0_2	727000	6250000	407	13600		2020-10-08-autobutyryl_new	800	504000	1320000	407	2000	0.69326
2020-10-07-autoacylation_total_protein	700	B0_3	706000	6120000	407	13300		2020-10-08-autobutyryl_new	800	523000	1270000	407	1840	0.740793
2020-10-07-autoacylation_total_protein	700	B0_4	417000	5680000	407	12900		2020-10-08-autobutyryl_new	800	281000	1160000	407	2160	0.673861
2020-10-07-autoacylation_total_protein	700	B5_1	542000	6060000	407	13600		2020-10-08-autobutyryl_new	800	387000	1140000	407	1840	0.714022
2020-10-07-autoacylation_total_protein	700	B5_2	493000	5880000	407	13200		2020-10-08-autobutyryl_new	800	422000	1210000	407	1940	0.855984
2020-10-07-autoacylation_total_protein	700	B5_3	466000	5800000	407	13100		2020-10-08-autobutyryl_new	800	390000	1150000	407	1880	0.83691
2020-10-07-autoacylation_total_protein	700	B5_4	534000	5810000	407	13000		2020-10-08-autobutyryl_new	800	521000	1290000	407	1890	0.975655
2020-10-07-autoacylation_total_protein	700	B10_1	357000	5740000	407	13200		2020-10-08-autobutyryl_new	800	402000	1180000	407	1900	1.12605
2020-10-07-autoacylation_total_protein	700	B10_2	409000	5640000	407	12900		2020-10-08-autobutyryl_new	800	462000	1280000	407	2020	1.12958
2020-10-07-autoacylation_total_protein	700	B10_3	387000	5640000	407	12900		2020-10-08-autobutyryl_new	800	544000	1350000	407	1980	1.40568
2020-10-07-autoacylation_total_protein	700	B10_4	379000	5670000	407	13000		2020-10-08-autobutyryl_new	800	485000	1270000	407	1920	1.27968
2020-10-07-autoacylation_total_protein	700	B15_1	341000	5710000	407	13200		2020-10-08-autobutyryl_new	800	459000	1210000	407	1840	1.34604
2020-10-07-autoacylation_total_protein	700	B15_2	324000	5540000	407	12800		2020-10-08-autobutyryl_new	800	526000	1320000	407	1960	1.62346
2020-10-07-autoacylation_total_protein	700	B15_3	305000	5500000	407	12800		2020-10-08-autobutyryl_new	800	601000	1410000	407	1990	1.97049
2020-10-07-autoacylation_total_protein	700	B15_4	295000	5710000	407	13300		2020-10-08-autobutyryl_new	800	545000	1370000	407	2020	1.84746
2020-10-07-autoacylation_total_protein	700	B20_1	249000	5320000	407	12500		2020-10-08-autobutyryl_new	800	386000	1110000	407	1770	1.5502
2020-10-07-autoacylation_total_protein	700	B20_2	208000	5160000	407	12200		2020-10-08-autobutyryl_new	800	581000	1340000	407	1860	2.79327
2020-10-07-autoacylation_total_protein	700	B20_3	120000	5120000	407	12300		2020-10-08-autobutyryl_new	800	408000	1170000	407	1880	3.4
2020-10-07-autoacylation_total_protein	700	B20_4	492000	6120000	407	13800		2020-10-08-autobutyryl_new	800	387000	1160000	407	1910

## Sheet: SAHA A485 Westerns
Blot 1																									Blot 1
p53	Channel	Name	Signal	Total	Area	Bkgnd.		p53ac	Channel	Signal	Total	Area	Bkgnd.	Normalized	Fold Change		Average	Stdev	Zeroed						H3 total	Channel	Name	Signal	Total	Area	Bkgnd.		K27ac	Channel	Signal	Total	Area	Bkgnd.	Normalized	Fold Change		Average	Stdev	Zeroed
2021-02-02-p300_p53ac800_p53700	700	U	2540000	3870000	416	3200		2021-02-02-p300_p53ac800_p53700	800	145000	463000	416	765	0.0570866	1		1	0	0						2021-02-03-p300_800K27ac_700H3	700	U	3550000	6150000	504	5160		2021-02-03-p300_800K27ac_700H3	800	110000	192000	504	164	0.0309859	1		1	0	0
2021-02-02-p300_p53ac800_p53700	700	P_100	3090000	4790000	468	3620		2021-02-02-p300_p53ac800_p53700	800	197000	661000	468	990	0.063754	1.1168		1.45204	0.197734	0.452036						2021-02-03-p300_800K27ac_700H3	700	P_100	2730000	5170000	400	6100		2021-02-03-p300_800K27ac_700H3	800	129000	208000	400	197	0.0472527	1.52498		1.41412	0.206272	0.414116
2021-02-02-p300_p53ac800_p53700	700	P_250	2880000	4410000	459	3350		2021-02-02-p300_p53ac800_p53700	800	193000	632000	459	957	0.0670139	1.1739		1.49431	0.360995	0.494309						2021-02-03-p300_800K27ac_700H3	700	P_250	2650000	4950000	416	5530		2021-02-03-p300_800K27ac_700H3	800	124000	206000	416	196	0.0467925	1.51012		1.58256	0.582488	0.582562
2021-02-02-p300_p53ac800_p53700	700	B_100	2610000	3930000	416	3180		2021-02-02-p300_p53ac800_p53700	800	158000	567000	416	984	0.0605364	1.06043		1.36543	0.208075	0.365432						2021-02-03-p300_800K27ac_700H3	700	B_100	2970000	5430000	459	5370		2021-02-03-p300_800K27ac_700H3	800	124000	213000	459	193	0.0417508	1.34741		1.45653	0.37954	0.456531
2021-02-02-p300_p53ac800_p53700	700	B_250	3290000	4900000	468	3440		2021-02-02-p300_p53ac800_p53700	800	241000	737000	468	1060	0.0732523	1.28318		1.38644	0.0947413	0.386442						2021-02-03-p300_800K27ac_700H3	700	B_250	2150000	4760000	336	7770		2021-02-03-p300_800K27ac_700H3	800	199000	289000	336	269	0.0925581	2.9871		2.2083	0.837581	1.2083
2021-02-02-p300_p53ac800_p53700	700	UA	2930000	4410000	432	3410		2021-02-02-p300_p53ac800_p53700	800	159000	563000	432	935	0.0542662	1		1	0	0						2021-02-03-p300_800K27ac_700H3	700	UA	3460000	6130000	504	5290		2021-02-03-p300_800K27ac_700H3	800	99100	192000	504	184	0.0286416	1		1	0	0
2021-02-02-p300_p53ac800_p53700	700	PA_100	3090000	4630000	442	3470		2021-02-02-p300_p53ac800_p53700	800	204000	612000	442	923	0.0660194	1.21658		1.09163	0.143235	0.0916273						2021-02-03-p300_800K27ac_700H3	700	PA_100	2800000	5710000	486	5990		2021-02-03-p300_800K27ac_700H3	800	86100	180000	486	193	0.03075	1.07361		0.902024	0.444637	-0.0979757
2021-02-02-p300_p53ac800_p53700	700	PA_250	3120000	4640000	442	3420		2021-02-02-p300_p53ac800_p53700	800	180000	591000	442	930	0.0576923	1.06313		1.11691	0.105619	0.116913						2021-02-03-p300_800K27ac_700H3	700	PA_250	3280000	6460000	551	5760		2021-02-03-p300_800K27ac_700H3	800	97100	202000	551	191	0.0296037	1.03359		0.87839	0.109284	-0.12161
2021-02-02-p300_p53ac800_p53700	700	BA_100	3280000	4910000	459	3550		2021-02-02-p300_p53ac800_p53700	800	187000	675000	459	1060	0.0570122	1.0506		1.08105	0.117876	0.0810487						2021-02-03-p300_800K27ac_700H3	700	BA_100	2870000	6080000	513	6260		2021-02-03-p300_800K27ac_700H3	800	101000	229000	513	249	0.0351916	1.22869		1.04078	0.139485	0.0407761
2021-02-02-p300_p53ac800_p53700	700	BA_250	3030000	4450000	432	3280		2021-02-02-p300_p53ac800_p53700	800	198000	633000	432	1010	0.0653465	1.20418		1.20714	0.28065	0.207141						2021-02-03-p300_800K27ac_700H3	700	BA_250	2510000	5230000	442	6160		2021-02-03-p300_800K27ac_700H3	800	82900	214000	442	296	0.0330279	1.15314		1.09631	0.420932	0.0963102
2021-02-02-p300_p53ac800_p53700	700	US	3150000	4680000	468	3280		2021-02-02-p300_p53ac800_p53700	800	2030000	2510000	468	1030	0.644444	1		1	0	0						2021-02-03-p300_800K27ac_700H3	700	US	2560000	5360000	432	6480		2021-02-03-p300_800K27ac_700H3	800	3230000	3710000	432	1090	1.26172	1		1	0
2021-02-02-p300_p53ac800_p53700	700	PS_100	3430000	5020000	459	3470		2021-02-02-p300_p53ac800_p53700	800	2220000	2710000	459	1080	0.64723	1.00432		1.22547	0.183088	0.22547						2021-02-03-p300_800K27ac_700H3	700	PS_100	3000000	5740000	448	6110		2021-02-03-p300_800K27ac_700H3	800	3650000	4110000	448	1040	1.21667	0.964293		0.975352	0.0746972
2021-02-02-p300_p53ac800_p53700	700	PS_250	3020000	4390000	416	3300		2021-02-02-p300_p53ac800_p53700	800	1190000	1590000	416	977	0.39404	0.611441		1.24722	0.561994	0.247222						2021-02-03-p300_800K27ac_700H3	700	PS_250	2540000	4750000	375	5880		2021-02-03-p300_800K27ac_700H3	800	2370000	2650000	375	760	0.933071	0.739524		0.979776	0.180565
2021-02-02-p300_p53ac800_p53700	700	BS_100	4000000	5750000	486	3620		2021-02-02-p300_p53ac800_p53700	800	3070000	3590000	486	1080	0.7675	1.19095		1.34908	0.301436	0.349076						2021-02-03-p300_800K27ac_700H3	700	BS_100	2980000	5740000	442	6240		2021-02-03-p300_800K27ac_700H3	800	3390000	3720000	442	744	1.13758	0.901614		1.02716	0.129465
2021-02-02-p300_p53ac800_p53700	700	BS_250	3940000	5580000	442	3710		2021-02-02-p300_p53ac800_p53700	800	2880000	3280000	442	917	0.730964	1.13426		0.952583	0.165794	-0.0474175						2021-02-03-p300_800K27ac_700H3	700	BS_250	2870000	5390000	375	6710		2021-02-03-p300_800K27ac_700H3	800	3140000	3460000	375	838	1.09408	0.867132		0.753402	0.169979
Blot 2
p53	Channel	Name	Signal	Total	Area	Bkgnd.		p53ac	Channel	Signal	Total	Area	Bkgnd.	Normalized	Fold Change		Blot 1	Blot 2	Blot 3	Blot 4	Blot 5	Blot 6	T.test		H3	Channel	Name	Signal	Total	Area	Bkgnd.		K27ac	Channel	Signal	Total	Area	Bkgnd.	Normalized	Fold Change		Blot 1	Blot 2	Blot 3	Blot 4	Blot 5	Blot 6	T.test
2021-02-02-p3002_p53ac800_p53700	700	U	1340000	2260000	459	2000		2021-02-02-p3002_p53ac800_p53700	800	67000	428000	459	786	0.05	1		0.0570866	0.05	0.0182584	0.0388614					2021-02-03-p3002_800K27ac_700H3	700	U	1580000	3580000	450	4460		2021-02-03-p3002_800K27ac_700H3	800	72100	176000	450	232	0.0456329	1		0.0309859	0.0456329	0.0767296	0.0784173	0.0254011	0.0296503
2021-02-02-p3002_p53ac800_p53700	700	P_100	1850000	2910000	532	2000		2021-02-02-p3002_p53ac800_p53700	800	140000	617000	532	896	0.0756757	1.51351		0.063754	0.0756757	0.0283333	0.0631902			0.0414088		2021-02-03-p3002_800K27ac_700H3	700	P_100	1840000	3940000	504	4180		2021-02-03-p3002_800K27ac_700H3	800	112000	231000	504	235	0.0608696	1.3339		0.0472527	0.0608696	0.0933333	0.137762	0.0291237	0.0446561	0.0450577
2021-02-02-p3002_p53ac800_p53700	700	P_250	1850000	2820000	532	1820		2021-02-02-p3002_p53ac800_p53700	800	105000	553000	532	842	0.0567568	1.13514		0.0670139	0.0567568	0.0366154	0.0646189			0.0382077		2021-02-03-p3002_800K27ac_700H3	700	P_250	2150000	4610000	600	4100		2021-02-03-p3002_800K27ac_700H3	800	113000	245000	600	220	0.0525581	1.15176		0.0467925	0.0525581	0.216239	0.128846	0.0299569	0.0353684	0.146899
2021-02-02-p3002_p53ac800_p53700	700	B_100	1710000	2660000	532	1800		2021-02-02-p3002_p53ac800_p53700	800	110000	545000	532	818	0.0643275	1.28655		0.0605364	0.0643275	0.0282313	0.0609557			0.0498993		2021-02-03-p3002_800K27ac_700H3	700	B_100	2020000	4040000	532	3790		2021-02-03-p3002_800K27ac_700H3	800	109000	223000	532	213	0.0539604	1.18249		0.0417508	0.0539604	0.139231	0.1656	0.0263774	0.0369	0.101885
2021-02-02-p3002_p53ac800_p53700	700	B_250	1630000	2440000	459	1750		2021-02-02-p3002_p53ac800_p53700	800	111000	469000	459	780	0.0680982	1.36196		0.0732523	0.0680982	0.0281379	0.0528333			0.00374788		2021-02-03-p3002_800K27ac_700H3	700	B_250	1860000	3690000	486	3780		2021-02-03-p3002_800K27ac_700H3	800	118000	219000	486	209	0.0634409	1.39024		0.0925581	0.0634409	0.241739	0.234783	0.0355435	0.0393939	0.0648249
2021-02-02-p3002_p53ac800_p53700	700	UA	1980000	3010000	504	2050		2021-02-02-p3002_p53ac800_p53700	800	161000	629000	504	929	0.0813131	1		0.0542662	0.0813131	0.037766	0.0589831					2021-02-03-p3002_800K27ac_700H3	700	UA	2190000	4560000	600	3950		2021-02-03-p3002_800K27ac_700H3	800	107000	239000	600	220	0.0488584	1		0.0286416	0.0488584	0.0196296	0.0197973	0.0265461	0.0551913
2021-02-02-p3002_p53ac800_p53700	700	PA_100	1860000	2830000	522	1840		2021-02-02-p3002_p53ac800_p53700	800	153000	600000	522	856	0.0822581	1.01162		0.0660194	0.0822581	0.0338889	0.0731959			0.274277		2021-02-03-p3002_800K27ac_700H3	700	PA_100	2170000	4510000	600	3900		2021-02-03-p3002_800K27ac_700H3	800	90200	223000	600	222	0.0415668	0.85076		0.03075	0.0415668	0.0107353	0.0356481	0.0149045	0.0319429	0.355206
2021-02-02-p3002_p53ac800_p53700	700	PA_250	1920000	2900000	486	2020		2021-02-02-p3002_p53ac800_p53700	800	157000	619000	486	950	0.0817708	1.00563		0.0576923	0.0817708	0.0486466	0.0655172			0.0968496		2021-02-03-p3002_800K27ac_700H3	700	PA_250	2000000	4320000	580	4000		2021-02-03-p3002_800K27ac_700H3	800	90200	225000	580	233	0.0451	0.923075		0.0296037	0.0451	0.0145946	0.0180488	0.0247619	0.0400529	0.112905
2021-02-02-p3002_p53ac800_p53700	700	BA_100	1830000	2780000	476	1980		2021-02-02-p3002_p53ac800_p53700	800	143000	582000	476	922	0.0781421	0.961002		0.0570122	0.0781421	0.0391275	0.0752941			0.379596		2021-02-03-p3002_800K27ac_700H3	700	BA_100	2110000	4290000	570	3830		2021-02-03-p3002_800K27ac_700H3	800	90900	222000	570	230	0.0430806	0.881742		0.0351916	0.0430806	0.0193333	0.0218954	0.0312351	0.0478344	0.994805
2021-02-02-p3002_p53ac800_p53700	700	BA_250	1780000	2700000	494	1880		2021-02-02-p3002_p53ac800_p53700	800	150000	605000	494	921	0.0842697	1.03636		0.0653465	0.0842697	0.062766	0.0546212			0.262021		2021-02-03-p3002_800K27ac_700H3	700	BA_250	2010000	4160000	522	4120		2021-02-03-p3002_800K27ac_700H3	800	103000	228000	522	241	0.0512438	1.04882		0.0330279	0.0512438	0.00678151		0.0351082	0.0889447	0.391412
2021-02-02-p3002_p53ac800_p53700	700	US	1670000	2550000	486	1800		2021-02-02-p3002_p53ac800_p53700	800	1000000	1450000	486	924	0.598802	1		0.644444	0.598802		0.228514	0.493976	0.502222			2021-02-03-p3002_800K27ac_700H3	700	US	1300000	3130000	400	4580		2021-02-03-p3002_800K27ac_700H3	800	2710000	3100000	400	974	2.08462	1		1.26172	2.08462	1.16236	0.942652	0.601732	0.783951
2021-02-02-p3002_p53ac800_p53700	700	PS_100	1830000	2800000	513	1880		2021-02-02-p3002_p53ac800_p53700	800	1620000	2130000	513	1000	0.885246	1.47836		0.64723	0.885246		0.283767	0.512821	0.685393	0.115124		2021-02-03-p3002_800K27ac_700H3	700	PS_100	1620000	3480000	425	4380		2021-02-03-p3002_800K27ac_700H3	800	3570000	4160000	425	1390	2.2037	1.05713		1.21667	2.2037	1.25475	0.819444	0.586207	0.711599	0.855281
2021-02-02-p3002_p53ac800_p53700	700	PS_250	1720000	2560000	459	1820		2021-02-02-p3002_p53ac800_p53700	800	969000	1410000	459	968	0.563372	0.940831		0.39404	0.563372		0.522047	0.584416	0.610811	0.669382		2021-02-03-p3002_800K27ac_700H3	700	PS_250	1550000	3380000	390	4700		2021-02-03-p3002_800K27ac_700H3	800	3230000	3710000	390	1240	2.08387	0.999643		0.933071	2.08387	1.22967	0.862069	0.790274	0.669291	0.561285
2021-02-02-p3002_p53ac800_p53700	700	BS_100	2130000	3200000	567	1880		2021-02-02-p3002_p53ac800_p53700	800	1860000	2500000	567	1130	0.873239	1.45831		0.7675	0.873239		0.430345	0.504762	0.598174	0.0353212		2021-02-03-p3002_800K27ac_700H3	700	BS_100	1760000	3810000	450	4540		2021-02-03-p3002_800K27ac_700H3	800	4160000	4720000	450	1260	2.36364	1.13385		1.13758	2.36364	1.34528	0.823529	0.706897	0.722611	0.555791
2021-02-02-p3002_p53ac800_p53700	700	BS_250	1860000	2810000	486	1940		2021-02-02-p3002_p53ac800_p53700	800	1090000	1500000	486	849	0.586022	0.978656		0.730964	0.586022		0.166065	0.555118	0.401531	0.881365		2021-02-03-p3002_800K27ac_700H3	700	BS_250	1540000	3530000	390	5110		2021-02-03-p3002_800K27ac_700H3	800	3000000	3380000	390	961	1.94805	0.93449		1.09408	1.94805	1.06752	0.685811	0.354545	0.379147	0.00483777
p53	Channel	Name	Signal	Total	Area	Bkgnd.		p53ac	Channel	Signal	Total	Area	Bkgnd.	Normalized	Fold Change		Blot 1	Blot 2	Blot 3	Blot 4	Blot 5	Blot 6			H3	Channel	Name	Signal	Total	Area	Bkgnd.		K27ac	Channel	Signal	Total	Area	Bkgnd.	Normalized	Fold Change			Blot 1	Blot 2	Blot 3	Blot 4	Blot 5	Blot 6
2021-02-14-p300-5_800p53ac_700p53	700	U	1780000	3130000	286	4730		2021-02-14-p300-5_800p53ac_700p53	800	32500	706000	286	2350	0.0182584	1	1	0	0	0	0					2021-02-10-p300_si_800H3K27ac_700H3	700	U	1590000	3110000	324	4710		2021-02-10-p300_si_800H3K27ac_700H3	800	122000	1310000	324	3670	0.0767296	1	0.0767296	1	0	0	0	0	0	0
2021-02-14-p300-5_800p53ac_700p53	700	P_100	1740000	3270000	336	4560		2021-02-14-p300-5_800p53ac_700p53	800	49300	837000	336	2340	0.0283333	1.55179	2	0.116795	0.513514	0.551795	0.62604					2021-02-10-p300_si_800H3K27ac_700H3	700	UA	1350000	2730000	288	4790		2021-02-10-p300_si_800H3K27ac_700H3	800	26500	1080000	288	3660	0.0196296	1.21639	0.0933333	2	0.524975	0.333896	0.216393	0.756784	0.146555	0.50609
2021-02-14-p300-5_800p53ac_700p53	700	P_250	1300000	2430000	252	4490		2021-02-14-p300-5_800p53ac_700p53	800	47600	631000	252	2310	0.0366154	2.0054	3	0.173898	0.135135	1.0054	0.662804					2021-02-10-p300_si_800H3K27ac_700H3	700	US	2710000	4630000	350	5480		2021-02-10-p300_si_800H3K27ac_700H3	800	3150000	4540000	350	3960	1.16236	2.8182	0.216239	3	0.51012	0.15176	1.8182	0.643084	0.179356	0.19285
2021-02-14-p300-5_800p53ac_700p53	700	B_100	1470000	2650000	273	4330		2021-02-14-p300-5_800p53ac_700p53	800	41500	654000	273	2240	0.0282313	1.54621	4	0.0604307	0.28655	0.546206	0.568542					2021-02-10-p300_si_800H3K27ac_700H3	700	P100_U	1350000	2650000	253	5160		2021-02-10-p300_si_800H3K27ac_700H3	800	126000	1040000	253	3600	0.0933333	1.81456	0.139231	4	0.347414	0.182489	0.814565	1.11178	0.038435	0.244505
2021-02-14-p300-5_800p53ac_700p53	700	B_250	1450000	2640000	280	4270		2021-02-14-p300-5_800p53ac_700p53	800	40800	671000	280	2250	0.0281379	1.54109	5	0.283178	0.361963	0.541093	0.359533					2021-02-10-p300_si_800H3K27ac_700H3	700	P100_UA	1360000	2840000	250	5930		2021-02-10-p300_si_800H3K27ac_700H3	800	14600	904000	250	3560	0.0107353	3.15053	0.241739	5	1.9871	0.390244	2.15053	1.99402	0.399291	0.328616
2021-02-14-p300-5_800p53ac_700p53	700	UA	1880000	3200000	275	4770		2021-02-14-p300-5_800p53ac_700p53	800	71000	725000	275	2380	0.037766	1	6	0	0	0	0					2021-02-10-p300_si_800H3K27ac_700H3	700	P100_US	2630000	4700000	364	5680		2021-02-10-p300_si_800H3K27ac_700H3	800	3300000	4710000	364	3860	1.25475	1	0.0196296	6	0	0	0	0	0	0
2021-02-14-p300-5_800p53ac_700p53	700	PA_100	1260000	2210000	220	4320		2021-02-14-p300-5_800p53ac_700p53	800	42700	541000	220	2270	0.0338889	0.89734	7	0.216584	0.0116209	-0.10266	0.240965					2021-02-10-p300_si_800H3K27ac_700H3	700	B100_U	1300000	2820000	325	4660		2021-02-10-p300_si_800H3K27ac_700H3	800	181000	1320000	325	3510	0.139231	0.546892	0.0107353	7	0.0736125	-0.14924	-0.453108	0.800657	-0.438543	-0.421233
2021-02-14-p300-5_800p53ac_700p53	700	PA_250	1330000	2540000	273	4440		2021-02-14-p300-5_800p53ac_700p53	800	64700	709000	273	2360	0.0486466	1.28811	8	0.063135	0.00562888	0.288108	0.110781					2021-02-10-p300_si_800H3K27ac_700H3	700	B100_UA	1350000	2880000	275	5550		2021-02-10-p300_si_800H3K27ac_700H3	800	26100	926000	275	3270	0.0193333	0.743498	0.0145946	8	0.0335889	-0.0769252	-0.256502	-0.088321	-0.0672095	-0.274289
2021-02-14-p300-5_800p53ac_700p53	700	BA_100	1490000	2850000	299	4550		2021-02-14-p300-5_800p53ac_700p53	800	58300	766000	299	2370	0.0391275	1.03605	9	0.0506021	-0.0389981	0.0360526	0.276538					2021-02-10-p300_si_800H3K27ac_700H3	700	B100_US	3070000	5490000	348	6940		2021-02-10-p300_si_800H3K27ac_700H3	800	4130000	5530000	348	4020	1.34528	0.984906	0.0193333	9	0.228689	-0.118258	-0.0150943	0.105981	0.176637	-0.133298
2021-02-14-p300-5_800p53ac_700p53	700	BA_250	1880000	3100000	260	4660		2021-02-14-p300-5_800p53ac_700p53	800	118000	748000	260	2420	0.062766	1.66197	10	0.204185	0.0363598	0.661972	-0.0739507					2021-02-10-p300_si_800H3K27ac_700H3	700	P250_U	1170000	2590000	253	5620		2021-02-10-p300_si_800H3K27ac_700H3	800	253000	1120000	253	3410	0.216239	0.345473	0.00678151	10	0.153143	0.0488213	-0.654527		0.32254	0.611573
																11	0	0		0	0	0			2021-02-10-p300_si_800H3K27ac_700H3	700	P250_UA	1110000	2530000	230	6180		2021-02-10-p300_si_800H3K27ac_700H3	800	16200	753000	230	3200	0.0145946	1	1.16236	11	0	0	0	0	0	0
																12	0.00432291	0.478361		0.241795	0.0381488	0.364721			2021-02-10-p300_si_800H3K27ac_700H3	700	P250_US	2090000	3710000	297	5450		2021-02-10-p300_si_800H3K27ac_700H3	800	2570000	3590000	297	3430	1.22967	1.07949	1.25475	12	-0.0357069	0.0571272	0.0794858	-0.130703	-0.0258	-0.0922914
																13	-0.388559	-0.0591686		1.28453	0.183085	0.216216			2021-02-10-p300_si_800H3K27ac_700H3	700	B250_U	1150000	2640000	275	5420		2021-02-10-p300_si_800H3K27ac_700H3	800	278000	1150000	275	3190	0.241739	1.0579	1.22967	13	-0.260476	-0.0003571	0.0579023	-0.0854858	0.313332	-0.146258
																14	0.190948	0.45831		0.883235	0.0218351	0.191053			2021-02-10-p300_si_800H3K27ac_700H3	700	B250_UA	1190000	2800000	286	5640		2021-02-10-p300_si_800H3K27ac_700H3	800	8070	935000	286	3240	0.00678151	1.15737	1.34528	14	-0.0983855	0.133848	0.157365	-0.12637	0.174771	-0.0782446
																15	0.134255	-0.0213441		-0.273282	0.123776	-0.200492			2021-02-10-p300_si_800H3K27ac_700H3	700	B250_US	3110000	5340000	480	4660		2021-02-10-p300_si_800H3K27ac_700H3	800	3320000	5140000	480	3800	1.06752	0.91841	1.06752	15	-0.132868	-0.0655101	-0.0815904	-0.272467	-0.410791	-0.516364
p53	Channel	Name	Signal	Total	Area	Bkgnd.		p53ac	Channel	Signal	Total	Area	Bkgnd.	Normalized	Fold Change		Average	Stdev	Zeroed						H3	Channel	Name	Signal	Total	Area	Bkgnd.		K27ac	Channel	Signal	Total	Area	Bkgnd.	Normalized	Fold Change
2021-02-14-p300-6_800p53ac_700p53	700	U	808000	1620000	180	4520		2021-02-14-p300-6_800p53ac_700p53	800	31400	444000	180	2290	0.0388614	1		1	0	0						2021-02-10-p300si2_800H3K27ac_700H3	700	U	1390000	2900000	242	6250		2021-02-10-p300si2_800H3K27ac_700H3	800	109000	694000	242	2420	0.0784173	1	0.0784173
2021-02-14-p300-6_800p53ac_700p53	700	P_100	815000	1590000	162	4770		2021-02-14-p300-6_800p53ac_700p53	800	51500	430000	162	2340	0.0631902	1.62604		1.45204	0.197734	0.452036						2021-02-10-p300si2_800H3K27ac_700H3	700	UA	1480000	3210000	240	7210		2021-02-10-p300si2_800H3K27ac_700H3	800	29300	645000	240	2570	0.0197973	1.75678	0.137762
2021-02-14-p300-6_800p53ac_700p53	700	P_250	879000	1770000	187	4770		2021-02-14-p300-6_800p53ac_700p53	800	56800	510000	187	2420	0.0646189	1.6628		1.36543	0.208075	0.365432						2021-02-10-p300si2_800H3K27ac_700H3	700	US	2790000	5630000	325	8740		2021-02-10-p300si2_800H3K27ac_700H3	800	2630000	3750000	325	3440	0.942652	1.64308	0.128846
2021-02-14-p300-6_800p53ac_700p53	700	B_100	858000	1820000	200	4800		2021-02-14-p300-6_800p53ac_700p53	800	52300	549000	200	2480	0.0609557	1.56854		1	0	0						2021-02-10-p300si2_800H3K27ac_700H3	700	P100_U	1430000	3320000	242	7790		2021-02-10-p300si2_800H3K27ac_700H3	800	197000	825000	242	2590	0.137762	2.11178	0.1656
2021-02-14-p300-6_800p53ac_700p53	700	B_250	1200000	2390000	252	4740		2021-02-14-p300-6_800p53ac_700p53	800	63400	693000	252	2500	0.0528333	1.35953		1.09163	0.143235	0.0916273						2021-02-10-p300si2_800H3K27ac_700H3	700	P100_UA	1080000	2220000	225	5100		2021-02-10-p300si2_800H3K27ac_700H3	800	38500	593000	225	2460	0.0356481	2.99402	0.234783
2021-02-14-p300-6_800p53ac_700p53	700	UA	1180000	2150000	200	4860		2021-02-14-p300-6_800p53ac_700p53	800	69600	558000	200	2440	0.0589831	1		1.08105	0.117876	0.0810487						2021-02-10-p300si2_800H3K27ac_700H3	700	P100_US	2880000	5340000	416	5900		2021-02-10-p300si2_800H3K27ac_700H3	800	2360000	3470000	416	2670	0.819444	1	0.0197973
2021-02-14-p300-6_800p53ac_700p53	700	PA_100	194000	1070000	200	4380		2021-02-14-p300-6_800p53ac_700p53	800	14200	460000	200	2230	0.0731959	1.24096		1	0	0						2021-02-10-p300si2_800H3K27ac_700H3	700	B100_U	1250000	2900000	220	7530		2021-02-10-p300si2_800H3K27ac_700H3	800	207000	766000	220	2540	0.1656	1.80066	0.0356481
2021-02-14-p300-6_800p53ac_700p53	700	PA_250	986000	1980000	220	4510		2021-02-14-p300-6_800p53ac_700p53	800	64600	580000	220	2340	0.0655172	1.11078		1.22547	0.183088	0.22547						2021-02-10-p300si2_800H3K27ac_700H3	700	B100_UA	1530000	3430000	286	6630		2021-02-10-p300si2_800H3K27ac_700H3	800	33500	760000	286	2540	0.0218954	0.911679	0.0180488
2021-02-14-p300-6_800p53ac_700p53	700	BA_100	1020000	2040000	210	4830		2021-02-14-p300-6_800p53ac_700p53	800	76800	615000	210	2560	0.0752941	1.27654		1.34908	0.301436	0.349076						2021-02-10-p300si2_800H3K27ac_700H3	700	B100_US	3230000	6120000	432	6690		2021-02-10-p300si2_800H3K27ac_700H3	800	2660000	3880000	432	2820	0.823529	1.10598	0.0218954
2021-02-14-p300-6_800p53ac_700p53	700	BA_250	1320000	2450000	231	4870		2021-02-14-p300-6_800p53ac_700p53	800	72100	675000	231	2610	0.0546212	0.926049										2021-02-10-p300si2_800H3K27ac_700H3	700	P250_U	1560000	3410000	264	7030		2021-02-10-p300si2_800H3K27ac_700H3	800	201000	936000	264	2790	0.128846	loading error
2021-02-14-p300-6_800p53ac_700p53	700	US	989000	1930000	200	4710		2021-02-14-p300-6_800p53ac_700p53	800	226000	729000	200	2520	0.228514	1										2021-02-10-p300si2_800H3K27ac_700H3	700	P250_UA	1640000	3550000	242	7890		2021-02-10-p300si2_800H3K27ac_700H3	800	29600	751000	242	2980	0.0180488	1	0.942652
2021-02-14-p300-6_800p53ac_700p53	700	PS_100	807000	1920000	231	4830		2021-02-14-p300-6_800p53ac_700p53	800	229000	826000	231	2580	0.283767	1.24179										2021-02-10-p300si2_800H3K27ac_700H3	700	P250_US	3190000	6070000	390	7380		2021-02-10-p300si2_800H3K27ac_700H3	800	2750000	4050000	390	3340	0.862069	0.869297	0.819444
2021-02-14-p300-6_800p53ac_700p53	700	PS_250	1270000	2670000	280	4980		2021-02-14-p300-6_800p53ac_700p53	800	663000	1430000	280	2720	0.522047	2.28453										2021-02-10-p300si2_800H3K27ac_700H3	700	B250_U	1840000	4220000	264	8980		2021-02-10-p300si2_800H3K27ac_700H3	800	432000	1320000	264	3360	0.234783	0.914514	0.862069
2021-02-14-p300-6_800p53ac_700p53	700	BS_100	1450000	3140000	336	5030		2021-02-14-p300-6_800p53ac_700p53	800	624000	1520000	336	2680	0.430345	1.88323										2021-02-10-p300si2_800H3K27ac_700H3	700	B250_UA	2650000	5660000	348	8640		2021-02-10-p300si2_800H3K27ac_700H3	800	817000	1980000	348	3340	0.308302	0.87363	0.823529
2021-02-14-p300-6_800p53ac_700p53	700	BS_250	831000	4060000	630	5120		2021-02-14-p300-6_800p53ac_700p53	800	138000	1870000	630	2740	0.166065	0.726718										2021-02-10-p300si2_800H3K27ac_700H3	700	B250_US	2960000	6070000	459	6790		2021-02-10-p300si2_800H3K27ac_700H3	800	2030000	3460000	459	3120	0.685811	0.727533	0.685811
																	Blot 1	Blot 2	Blot 3	Blot 4	Blot 5	Blot 6
p53	Channel	Name	Signal	Total	Area	Bkgnd.		p53ac	Channel	Name	Signal	Total	Area	Normalized	Fold Change	1	0	0	0	0					H3	Channel	Name	Signal	Total	Area	Bkgnd.		K27ac	Channel	Signal	Total	Area	Bkgnd.	Normalized	Fold Change
2021-02-07-p300si_800p53ac_700p53	700	US	2490000	3950000	288	5050		2021-02-07-p300si_800p53ac_700p53	800	1230000	4750000	288	12200	0.493976	1	2	0.116795	0.513514	0.551795	0.62604					2021-02-16-p300-6_700H3K27ac_800H3	700	U	47500	517000	308	1520		2021-02-16-p300-6_700H3K27ac_800H3	800	1870000	2520000	308	2130	0.0254011	1
2021-02-07-p300si_800p53ac_700p53	700	P100_US	2340000	3740000	275	5080		2021-02-07-p300si_800p53ac_700p53	800	1200000	4490000	275	12000	0.512821	1.03815	3	0.0604307	0.28655	0.546206	0.568542					2021-02-16-p300-6_700H3K27ac_800H3	700	P_100	56500	528000	294	1600		2021-02-16-p300-6_700H3K27ac_800H3	800	1940000	2690000	294	2550	0.0291237	1.14655
2021-02-07-p300si_800p53ac_700p53	700	B100_US	3080000	4690000	308	5230		2021-02-07-p300si_800p53ac_700p53	800	1800000	5110000	308	10700	0.584416	1.18309	4	0	0	0	0					2021-02-16-p300-6_700H3K27ac_800H3	700	P_250	69500	567000	308	1620		2021-02-16-p300-6_700H3K27ac_800H3	800	2320000	3130000	308	2650	0.0299569	1.17936
2021-02-07-p300si_800p53ac_700p53	700	P250_US	2100000	3470000	288	4750		2021-02-07-p300si_800p53ac_700p53	800	1060000	4460000	288	11800	0.504762	1.02184	5	0.216584	0.0116209	-0.10266	0.240965					2021-02-16-p300-6_700H3K27ac_800H3	700	B_100	69900	664000	374	1590		2021-02-16-p300-6_700H3K27ac_800H3	800	2650000	3580000	374	2490	0.0263774	1.03843
2021-02-07-p300si_800p53ac_700p53	700	B250_US	2540000	4180000	312	5240		2021-02-07-p300si_800p53ac_700p53	800	1410000	5250000	312	12300	0.555118	1.12378	6	0.0506021	-0.0389981	0.0360526	0.276538					2021-02-16-p300-6_700H3K27ac_800H3	700	B_250	98100	743000	416	1550		2021-02-16-p300-6_700H3K27ac_800H3	800	2760000	4140000	416	3300	0.0355435	1.39929
																7	0	0		0	0	0			2021-02-16-p300-6_700H3K27ac_800H3	700	UA	80700	695000	414	1480		2021-02-16-p300-6_700H3K27ac_800H3	800	3040000	4080000	414	2490	0.0265461	1
p53	Channel	Name	Signal	Total	Area	Bkgnd.		p53ac	Channel	Signal	Total	Area	Bkgnd.	Normalized	Fold Change	8	0.00432291	0.478361		0.241795	0.0381488	0.364721			2021-02-16-p300-6_700H3K27ac_800H3	700	PA_100	23400	407000	264	1450		2021-02-16-p300-6_700H3K27ac_800H3	800	1570000	2330000	264	2880	0.0149045	0.561457
2021-02-07-p300si2_800p53ac_700p53	700	US	2250000	3520000	288	4400		2021-02-07-p300si2_800p53ac_700p53	800	1130000	3800000	288	9300	0.502222	1	9	0.190948	0.45831		0.883235	0.0218351	0.191053			2021-02-16-p300-6_700H3K27ac_800H3	700	PA_250	72800	659000	396	1480		2021-02-16-p300-6_700H3K27ac_800H3	800	2940000	4090000	396	2900	0.0247619	0.93279
2021-02-07-p300si2_800p53ac_700p53	700	P100_US	1780000	3120000	240	5550		2021-02-07-p300si2_800p53ac_700p53	800	1220000	3200000	240	8220	0.685393	1.36472										2021-02-16-p300-6_700H3K27ac_800H3	700	BA_100	78400	670000	384	1540		2021-02-16-p300-6_700H3K27ac_800H3	800	2510000	3990000	384	3870	0.0312351	1.17664
2021-02-07-p300si2_800p53ac_700p53	700	B100_US	1850000	3410000	275	5640		2021-02-07-p300si2_800p53ac_700p53	800	1130000	3430000	275	8360	0.610811	1.21622										2021-02-16-p300-6_700H3K27ac_800H3	700	BA_250	81100	585000	345	1460		2021-02-16-p300-6_700H3K27ac_800H3	800	2310000	3800000	345	4330	0.0351082	1.32254
2021-02-07-p300si2_800p53ac_700p53	700	P250_US	2190000	3460000	276	4620		2021-02-07-p300si2_800p53ac_700p53	800	1310000	4150000	276	10300	0.598174	1.19105										2021-02-16-p300-6_700H3K27ac_800H3	700	US	1390000	1880000	273	1780		2021-02-16-p300-6_700H3K27ac_800H3	800	2310000	3520000	273	4430	0.601732	1
2021-02-07-p300si2_800p53ac_700p53	700	B250_US	1960000	3390000	294	4860		2021-02-07-p300si2_800p53ac_700p53	800	787000	3580000	294	9500	0.401531	0.799508										2021-02-16-p300-6_700H3K27ac_800H3	700	PS_100	1530000	2080000	320	1710		2021-02-16-p300-6_700H3K27ac_800H3	800	2610000	3790000	320	3690	0.586207	0.9742
																									2021-02-16-p300-6_700H3K27ac_800H3	700	PS_250	2600000	3270000	360	1870		2021-02-16-p300-6_700H3K27ac_800H3	800	3290000	4900000	360	4480	0.790274	1.31333
																									2021-02-16-p300-6_700H3K27ac_800H3	700	BS_100	2460000	3150000	352	1960		2021-02-16-p300-6_700H3K27ac_800H3	800	3480000	4790000	352	3710	0.706897	1.17477
																									2021-02-16-p300-6_700H3K27ac_800H3	700	BS_250	1170000	2640000	858	1720		2021-02-16-p300-6_700H3K27ac_800H3	800	3300000	5440000	858	2490	0.354545	0.589209
																									H3	Channel	Name	Signal	Total	Area	Bkgnd.		K27ac	Channel	Signal	Total	Area	Bkgnd.	Normalized	Fold Change
																									2021-02-16-p300-5_700H3K27ac_800H3_small	700	U	42400	332000	210	1380		2021-02-16-p300-5_700H3K27ac_800H3_small	800	1430000	2270000	210	3990	0.0296503	1
																									2021-02-16-p300-5_700H3K27ac_800H3_small	700	P_100	84400	443000	273	1310		2021-02-16-p300-5_700H3K27ac_800H3_small	800	1890000	2670000	273	2840	0.0446561	1.50609
																									2021-02-16-p300-5_700H3K27ac_800H3_small	700	P_250	67200	413000	264	1310		2021-02-16-p300-5_700H3K27ac_800H3_small	800	1900000	2500000	264	2260	0.0353684	1.19285
																									2021-02-16-p300-5_700H3K27ac_800H3_small	700	B_100	73800	462000	299	1300		2021-02-16-p300-5_700H3K27ac_800H3_small	800	2000000	2630000	299	2090	0.0369	1.2445
																									2021-02-16-p300-5_700H3K27ac_800H3_small	700	B_250	78000	473000	308	1280		2021-02-16-p300-5_700H3K27ac_800H3_small	800	1980000	2700000	308	2320	0.0393939	1.32862
																									2021-02-16-p300-5_700H3K27ac_800H3_small	700	UA	101000	450000	276	1260		2021-02-16-p300-5_700H3K27ac_800H3_small	800	1830000	2990000	276	4180	0.0551913	1
																									2021-02-16-p300-5_700H3K27ac_800H3_small	700	PA_100	55900	401000	286	1200		2021-02-16-p300-5_700H3K27ac_800H3_small	800	1750000	2600000	286	2970	0.0319429	0.578767
																									2021-02-16-p300-5_700H3K27ac_800H3_small	700	PA_250	75700	431000	280	1270		2021-02-16-p300-5_700H3K27ac_800H3_small	800	1890000	2570000	280	2420	0.0400529	0.725711
Blot 3																									2021-02-16-p300-5_700H3K27ac_800H3_small	700	BA_100	75100	419000	264	1300		2021-02-16-p300-5_700H3K27ac_800H3_small	800	1570000	2530000	264	3640	0.0478344	0.866702
p53	Channel																								2021-02-16-p300-5_700H3K27ac_800H3_small	700	BA_250	177000	655000	384	1240		2021-02-16-p300-5_700H3K27ac_800H3_small	800	1990000	3180000	384	3090	0.0889447	1.61157
2021-02-07-p300si_800p53ac_700p53	700																								2021-02-16-p300-5_700H3K27ac_800H3_small	700	US	3810000	4800000	288	3430		2021-02-16-p300-5_700H3K27ac_800H3_small	800	4860000	6770000	288	6610	0.783951	1
2021-02-07-p300si_800p53ac_700p53	700																								2021-02-16-p300-5_700H3K27ac_800H3_small	700	PS_100	2270000	2850000	220	2650		2021-02-16-p300-5_700H3K27ac_800H3_small	800	3190000	4290000	220	5000	0.711599	0.907709
2021-02-07-p300si_800p53ac_700p53	700																								2021-02-16-p300-5_700H3K27ac_800H3_small	700	PS_250	1700000	2160000	220	2100		2021-02-16-p300-5_700H3K27ac_800H3_small	800	2540000	3530000	220	4500	0.669291	0.853742
2021-02-07-p300si_800p53ac_700p53	700																								2021-02-16-p300-5_700H3K27ac_800H3_small	700	BS_100	3100000	4000000	352	2560		2021-02-16-p300-5_700H3K27ac_800H3_small	800	4290000	5900000	352	4590	0.722611	0.921755
2021-02-07-p300si_800p53ac_700p53	700																								2021-02-16-p300-5_700H3K27ac_800H3_small	700	BS_250	1600000	2820000	858	1420		2021-02-16-p300-5_700H3K27ac_800H3_small	800	4220000	6380000	858	2520	0.379147	0.483636
p53	Channel
2021-02-07-p300si2_800p53ac_700p53	700
2021-02-07-p300si2_800p53ac_700p53	700
2021-02-07-p300si2_800p53ac_700p53	700
2021-02-07-p300si2_800p53ac_700p53	700
2021-02-07-p300si2_800p53ac_700p53	700
[truncated: 21 more columns]

## Sheet: p300 Transfection Westerns
K27
H3	Channel	Name	Signal	Total	Area	Bkgnd.		K27ac	Channel	Name	Signal	Total	Area	Bkgnd.	Normalized		H3	Channel	Name	Signal	Total	Area	Bkgnd.		K27ac	Channel	Name	Signal	Total	Area	Bkgnd.	Normalized		H3	Channel	Name	Signal	Total	Area	Bkgnd.		K27ac	Channel	Name	Signal	Total	Area	Bkgnd.	Normalized
2021-05-17-p300_1_800K27ac	700	Sham_U1	2290000	2920000	360	1750		2021-05-17-p300_1_800K27ac	800	Sham_U1	36300	119000	360	229	0.0158515		2021-05-20-p300_2_800K27ac	700	Sham_U2	572000	1380000	320	2520		2021-05-20-p300_2_800K27ac	800	Sham_U2	14500	75300	320	190	0.0253497		2021-05-26-p300_1_K27ac	700	Sham_U2	140000	3770000	225	16100		2021-05-26-p300_1_K27ac	800	Sham_U2	73600	2430000	225	10500	0.525714
2021-05-17-p300_1_800K27ac	700	Sham_P1	2050000	2900000	360	2390		2021-05-17-p300_1_800K27ac	800	Sham_P1	439000	518000	360	218	0.214146		2021-05-20-p300_2_800K27ac	700	Sham_P2	363000	981000	230	2680		2021-05-20-p300_2_800K27ac	800	Sham_P2	13900	57000	230	187	0.038292		2021-05-26-p300_1_K27ac	700	Sham_P2	297000	5430000	320	16000		2021-05-26-p300_1_K27ac	800	Sham_P2	182000	3370000	320	9950	0.612795
2021-05-17-p300_1_800K27ac	700	WT_U1	1900000	3110000	299	4050		2021-05-17-p300_1_800K27ac	800	WT_U1	368000	440000	299	239	0.193684		2021-05-20-p300_2_800K27ac	700	WT_U2	1290000	2480000	250	4780		2021-05-20-p300_2_800K27ac	800	WT_U2	105000	157000	250	206	0.0813953		2021-05-26-p300_1_K27ac	700	WT_U2	357000	3680000	207	16100		2021-05-26-p300_1_K27ac	800	WT_U2	206000	2180000	207	9510	0.577031
2021-05-17-p300_1_800K27ac	700	WT_P1	2060000	3950000	338	5600		2021-05-17-p300_1_800K27ac	800	WT_P1	3190000	3290000	338	311	1.54854		2021-05-20-p300_2_800K27ac	700	WT_P2	1520000	3110000	240	6640		2021-05-20-p300_2_800K27ac	800	WT_P2	552000	605000	240	223	0.363158		2021-05-26-p300_1_K27ac	700	WT_P2	550000	3330000	171	16300		2021-05-26-p300_1_K27ac	800	WT_P2	743000	2360000	171	9450	1.35091
2021-05-17-p300_1_800K27ac	700	Glu_U1	1790000	3060000	250	5100		2021-05-17-p300_1_800K27ac	800	Glu_U1	596000	658000	250	245	0.332961		2021-05-20-p300_2_800K27ac	700	Glu_U2	1190000	2210000	220	4650		2021-05-20-p300_2_800K27ac	800	Glu_U2	118000	162000	220	203	0.0991597		2021-05-26-p300_1_K27ac	700	Glu_U2	576000	3810000	210	15400		2021-05-26-p300_1_K27ac	800	Glu_U2	350000	2230000	210	8980	0.607639
2021-05-17-p300_1_800K27ac	700	Glu_P1	2200000	3620000	325	4360		2021-05-17-p300_1_800K27ac	800	Glu_P1	2200000	2280000	325	257	1		2021-05-20-p300_2_800K27ac	700	Glu_P2	1590000	3070000	299	4950		2021-05-20-p300_2_800K27ac	800	Glu_P2	283000	354000	299	238	0.177987		2021-05-26-p300_1_K27ac	700	Glu_P2	667000	4270000	231	15600		2021-05-26-p300_1_K27ac	800	Glu_P2	993000	3010000	231	8730	1.48876
2021-05-17-p300_1_800K27ac	700	Sham_U2	1450000	1880000	270	1570		2021-05-17-p300_1_800K27ac	800	Sham_U2	25400	80700	270	205	0.0175172		2021-05-20-p300_2_800K27ac	700	Sham_U3	393000	1050000	253	2600		2021-05-20-p300_2_800K27ac	800	Sham_U3	8190	81800	253	291	0.0208397		2021-05-26-p300_1_K27ac	700	Glu_P3	696000	4750000	264	15400		2021-05-26-p300_1_K27ac	800	Glu_P3	962000	3280000	264	8760	1.38218
2021-05-17-p300_1_800K27ac	700	Sham_P2	1370000	1890000	338	1530		2021-05-17-p300_1_800K27ac	800	Sham_P2	151000	223000	338	214	0.110219		2021-05-20-p300_2_800K27ac	700	Sham_P3	735000	1790000	336	3130		2021-05-20-p300_2_800K27ac	800	Sham_P3	35700	117000	336	243	0.0485714		2021-05-26-p300_1_K27ac	700	Glu_U3	588000	4620000	264	15300		2021-05-26-p300_1_K27ac	800	Glu_U3	407000	2790000	264	9040	0.692177
2021-05-17-p300_1_800K27ac	700	WT_U2	2060000	3940000	297	6300		2021-05-17-p300_1_800K27ac	800	WT_U2	904000	987000	297	278	0.438835		2021-05-20-p300_2_800K27ac	700	WT_U3	1630000	3070000	336	4280		2021-05-20-p300_2_800K27ac	800	WT_U3	78000	159000	336	242	0.0478528		2021-05-26-p300_1_K27ac	700	WT_U3	559000	5920000	364	14700		2021-05-26-p300_1_K27ac	800	WT_U3	240000	3500000	364	8940	0.429338
2021-05-17-p300_1_800K27ac	700	WT_P2	2060000	4220000	338	6390		2021-05-17-p300_1_800K27ac	800	WT_P2	3060000	3180000	338	331	1.48544		2021-05-20-p300_2_800K27ac	700	WT_P3	2080000	4670000	351	7370		2021-05-20-p300_2_800K27ac	800	WT_P3	580000	669000	351	253	0.278846		2021-05-26-p300_1_K27ac	700	WT_P3	718000	4540000	250	15300		2021-05-26-p300_1_K27ac	800	WT_P3	674000	2950000	250	9100	0.938719
2021-05-17-p300_1_800K27ac	700	Glu_U2	2670000	3990000	390	3390		2021-05-17-p300_1_800K27ac	800	Glu_U2	469000	550000	390	209	0.175655		2021-05-20-p300_2_800K27ac	700	Glu_U3	1500000	2760000	308	4070		2021-05-20-p300_2_800K27ac	800	Glu_U3	122000	196000	308	241	0.0813333		2021-05-26-p300_1_K27ac	700	Sham_U3	87900	3800000	240	15500		2021-05-26-p300_1_K27ac	800	Sham_U3	34200	2220000	240	9100	0.389078
2021-05-17-p300_1_800K27ac	700	Glu_P2	2630000	3650000	609	1680		2021-05-17-p300_1_800K27ac	800	Glu_P2	1060000	1190000	609	209	0.403042		2021-05-20-p300_2_800K27ac	700	Glu_P3	1330000	2930000	336	4770		2021-05-20-p300_2_800K27ac	800	Glu_P3	232000	326000	336	279	0.174436		2021-05-26-p300_1_K27ac	700	Sham_P3	109000	4970000	308	15800		2021-05-26-p300_1_K27ac	800	Sham_P3	92100	2980000	308	9390	0.844954
K18
H3	Channel	Name	Signal	Total	Area	Bkgnd.		K18ac	Channel	Name	Signal	Total	Area	Bkgnd.	Normalized		H3	Channel	Name	Signal	Total	Area	Bkgnd.		K18ac	Channel	Name	Signal	Total	Area	Bkgnd.	Normalized		H3	Channel	Name	Signal	Total	Area	Bkgnd.		K18ac	Channel	Name	Signal	Total	Area	Bkgnd.	Normalized
2021-05-19-p300_2_800K18ac	700	Sham_U2	364000	1170000	280	2880		2021-05-19-p300_2_800K18ac	800	Sham_U2	83900	196000	280	402	0.230495		2021-05-27-p300_1_k18AC	700	Sham_U2	868000	1740000	338	2590		2021-05-27-p300_1_k18AC	800	Sham_U2	158000	2520000	338	6980	0.182028		2021-05-26-p300_2_K18ac	700	Sham_U2	110000	2110000	297	6740		2021-05-26-p300_2_K18ac	800	Sham_U2	68800	4230000	297	14000	0.625455
2021-05-19-p300_2_800K18ac	700	Sham_P2	224000	1160000	324	2880		2021-05-19-p300_2_800K18ac	800	Sham_P2	90900	219000	324	394	0.405804		2021-05-27-p300_1_k18AC	700	Sham_P2	1380000	2340000	416	2300		2021-05-27-p300_1_k18AC	800	Sham_P2	244000	2720000	416	5950	0.176812		2021-05-26-p300_2_K18ac	700	Sham_P2	253000	2330000	319	6520		2021-05-26-p300_2_K18ac	800	Sham_P2	364000	4740000	319	13700	1.43874
2021-05-19-p300_2_800K18ac	700	WT_U2	2810000	4340000	264	5800		2021-05-19-p300_2_800K18ac	800	WT_U2	479000	610000	264	495	0.170463		2021-05-27-p300_1_k18AC	700	WT_U2	2100000	2700000	242	2480		2021-05-27-p300_1_k18AC	800	WT_U2	337000	1670000	242	5490	0.160476		2021-05-26-p300_2_K18ac	700	WT_U2	1250000	2850000	250	6390		2021-05-26-p300_2_K18ac	800	WT_U2	154000	3580000	250	13700	0.1232
2021-05-19-p300_2_800K18ac	700	WT_P2	4320000	6240000	322	5940		2021-05-19-p300_2_800K18ac	800	WT_P2	2070000	2250000	322	553	0.479167		2021-05-27-p300_1_k18AC	700	WT_P2	2550000	3300000	300	2500		2021-05-27-p300_1_k18AC	800	WT_P2	672000	2310000	300	5450	0.263529		2021-05-26-p300_2_K18ac	700	WT_P2	1580000	3290000	264	6480		2021-05-26-p300_2_K18ac	800	WT_P2	480000	4010000	264	13400	0.303797
2021-05-19-p300_2_800K18ac	700	Glu_U2	2710000	3880000	209	5620		2021-05-19-p300_2_800K18ac	800	Glu_U2	503000	599000	209	461	0.185609		2021-05-27-p300_1_k18AC	700	Glu_U2	2410000	3200000	345	2310		2021-05-27-p300_1_k18AC	800	Glu_U2	489000	2250000	345	5090	0.202905		2021-05-26-p300_2_K18ac	700	Glu_U2	1220000	2840000	250	6470		2021-05-26-p300_2_K18ac	800	Glu_U2	312000	3600000	250	13100	0.255738
2021-05-19-p300_2_800K18ac	700	Glu_P2	2860000	4250000	247	5650		2021-05-19-p300_2_800K18ac	800	Glu_P2	1170000	1290000	247	484	0.409091		2021-05-27-p300_1_k18AC	700	Glu_P2	2070000	2740000	312	2150		2021-05-27-p300_1_k18AC	800	Glu_P2	592000	2040000	312	4630	0.28599		2021-05-26-p300_2_K18ac	700	Glu_P2	1200000	2960000	250	7010		2021-05-26-p300_2_K18ac	800	Glu_P2	582000	4130000	250	14200	0.485
2021-05-19-p300_2_800K18ac	700	Sham_U3	194000	1070000	270	3250		2021-05-19-p300_2_800K18ac	800	Sham_U3	50000	159000	270	405	0.257732		2021-05-27-p300_1_k18AC	700	Glu_P3	2270000	2980000	312	2290		2021-05-27-p300_1_k18AC	800	Glu_P3	605000	2080000	312	4710	0.26652		2021-05-26-p300_2_K18ac	700	Glu_P3	1090000	2910000	286	6360		2021-05-26-p300_2_K18ac	800	Glu_P3	465000	4320000	286	13500	0.426606
2021-05-19-p300_2_800K18ac	700	Sham_P3	478000	1420000	242	3900		2021-05-19-p300_2_800K18ac	800	Sham_P3	185000	278000	242	385	0.387029		2021-05-27-p300_1_k18AC	700	Glu_U3	2840000	3810000	420	2300		2021-05-27-p300_1_k18AC	800	Glu_U3	530000	2590000	420	4900	0.18662		2021-05-26-p300_2_K18ac	700	Glu_U3	1350000	3210000	299	6250		2021-05-26-p300_2_K18ac	800	Glu_U3	206000	3920000	299	12400	0.152593
2021-05-19-p300_2_800K18ac	700	WT_U3	2250000	3950000	288	5910		2021-05-19-p300_2_800K18ac	800	WT_U3	329000	454000	288	431	0.146222		2021-05-27-p300_1_k18AC	700	WT_U3	2530000	3410000	435	2020		2021-05-27-p300_1_k18AC	800	WT_U3	345000	2410000	435	4750	0.136364		2021-05-26-p300_2_K18ac	700	WT_P3	1310000	3140000	276	6640		2021-05-26-p300_2_K18ac	800	WT_P3	332000	4280000	276	14300	0.253435
2021-05-19-p300_2_800K18ac	700	WT_P3	4370000	6900000	297	8500		2021-05-19-p300_2_800K18ac	800	WT_P3	1920000	2090000	297	568	0.439359		2021-05-27-p300_1_k18AC	700	WT_P3	2380000	3190000	390	2090		2021-05-27-p300_1_k18AC	800	WT_P3	624000	2480000	390	4770	0.262185		2021-05-26-p300_2_K18ac	700	WT_U3	1260000	3470000	364	6070		2021-05-26-p300_2_K18ac	800	WT_U3	166000	5170000	364	13700	0.131746
2021-05-19-p300_2_800K18ac	700	Glu_U3	2740000	3860000	234	4790		2021-05-19-p300_2_800K18ac	800	Glu_U3	482000	611000	234	552	0.175912		2021-05-27-p300_1_k18AC	700	Sham_U3	586000	1230000	325	1980		2021-05-27-p300_1_k18AC	800	Sham_U3	68300	1600000	325	4700	0.116553		2021-05-26-p300_2_K18ac	700	Sham_P3	683000	2880000	330	6660		2021-05-26-p300_2_K18ac	800	Sham_P3	257000	5110000	330	14700	0.376281
2021-05-19-p300_2_800K18ac	700	Glu_P3	2400000	4560000	375	5770		2021-05-19-p300_2_800K18ac	800	Glu_P3	838000	1020000	375	495	0.349167		2021-05-27-p300_1_k18AC	700	Sham_P3	492000	1790000	667	1940		2021-05-27-p300_1_k18AC	800	Sham_P3	63600	3420000	667	5030	0.129268		2021-05-26-p300_2_K18ac	700	Sham_U3	147000	2330000	351	6210		2021-05-26-p300_2_K18ac	800	Sham_U3	57300	4910000	351	13800	0.389796

[truncated: 2 more sheets: Western HAT Assays, Radioactive HAT Assays]
