# Supplementary figures and images for: Short-chain fatty acids activate acetyltransferase p300
Source: eLife journal article supplement (doi:10.7554/elife.72171), 2021-10-22

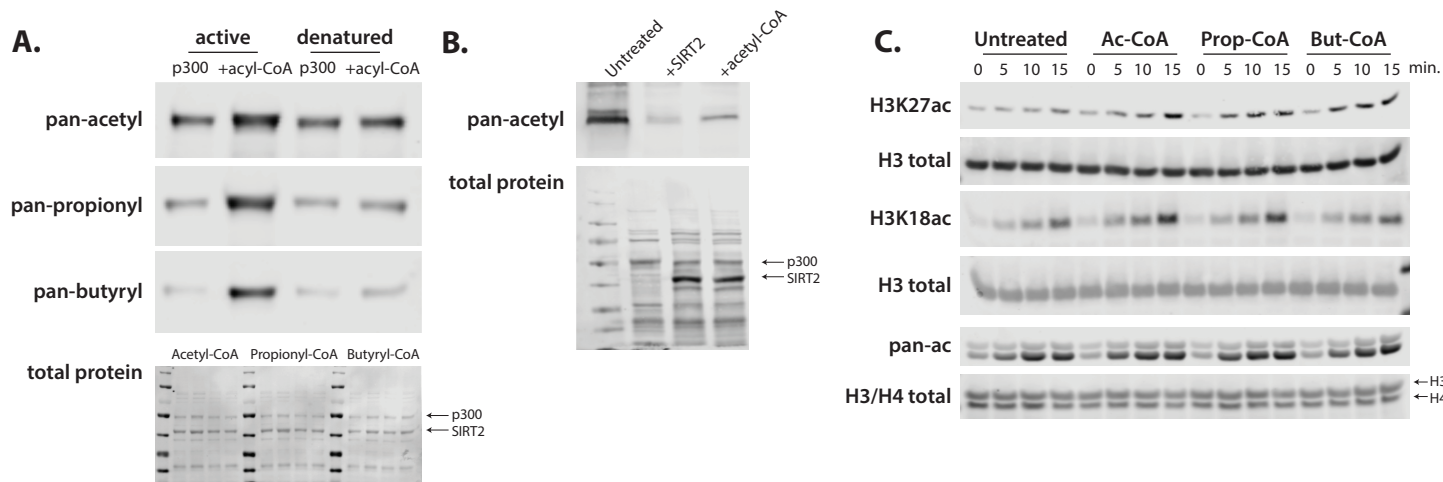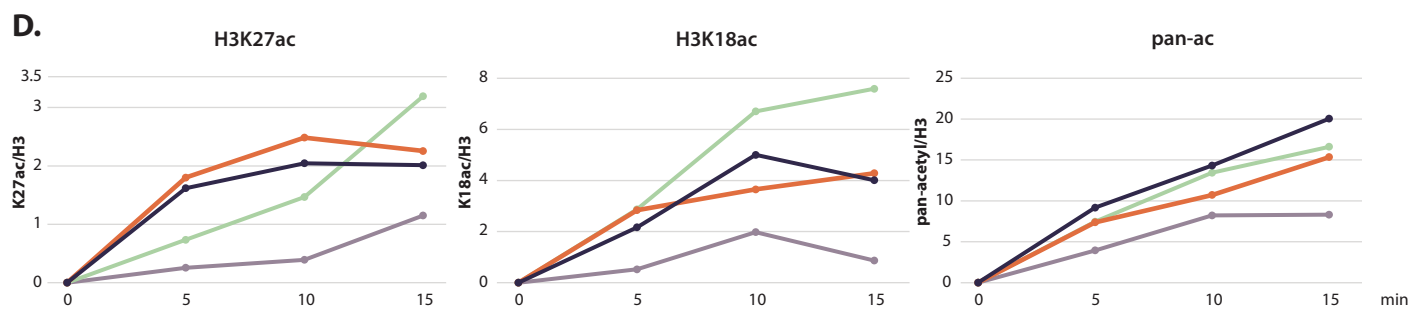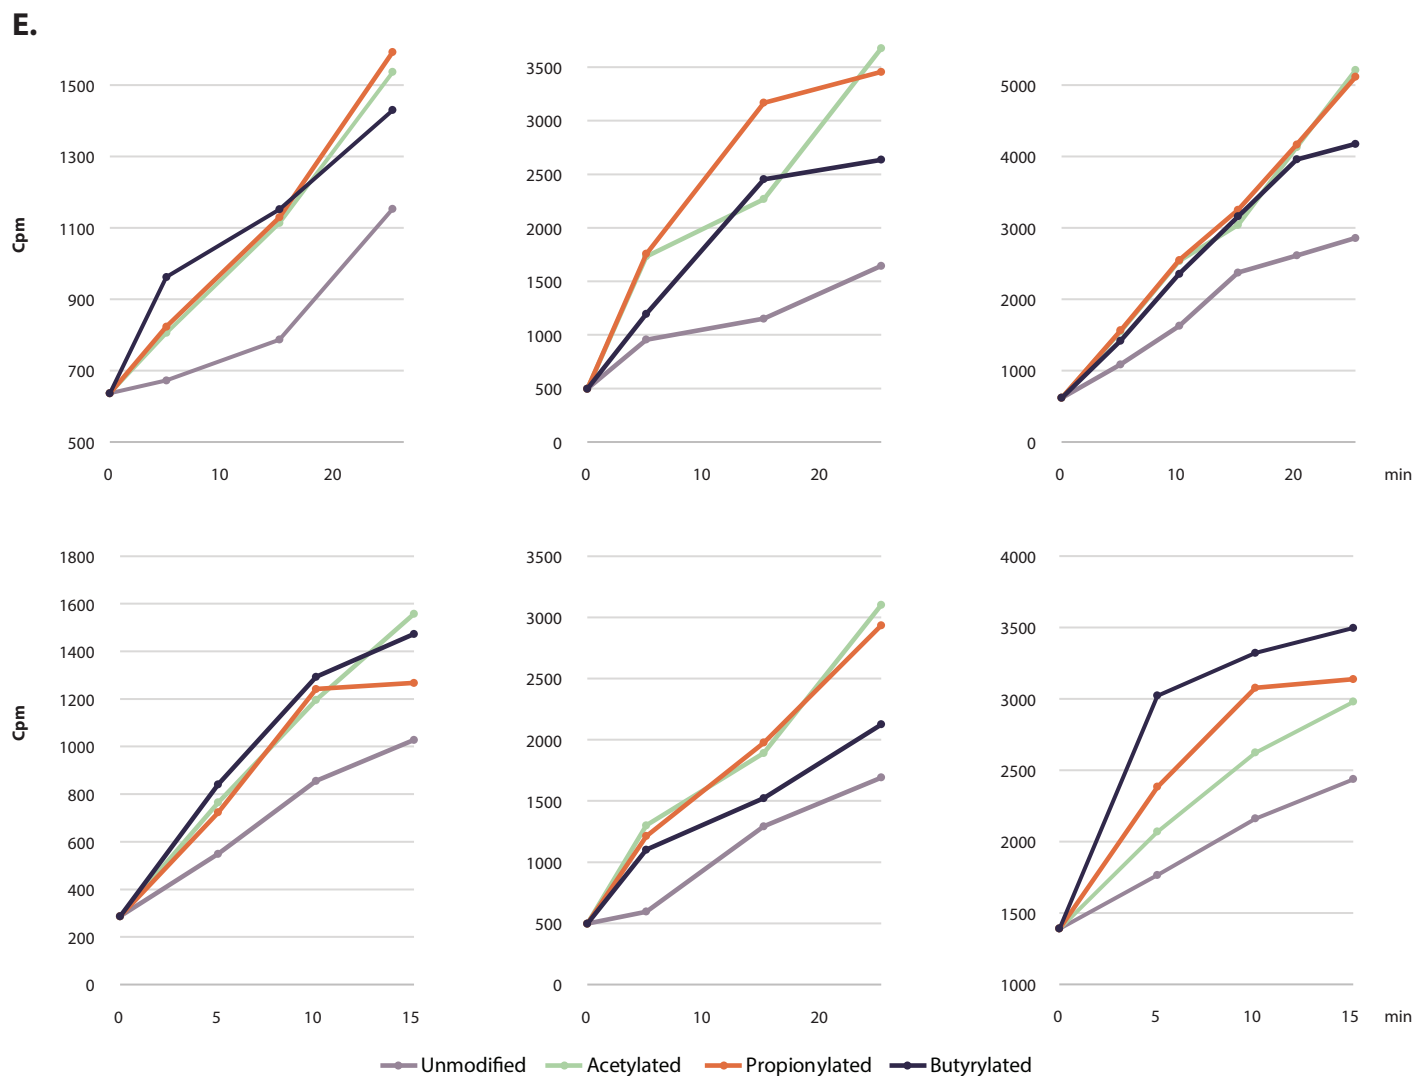

Supplement: supp [file elife-72171-supp-v1.zip]

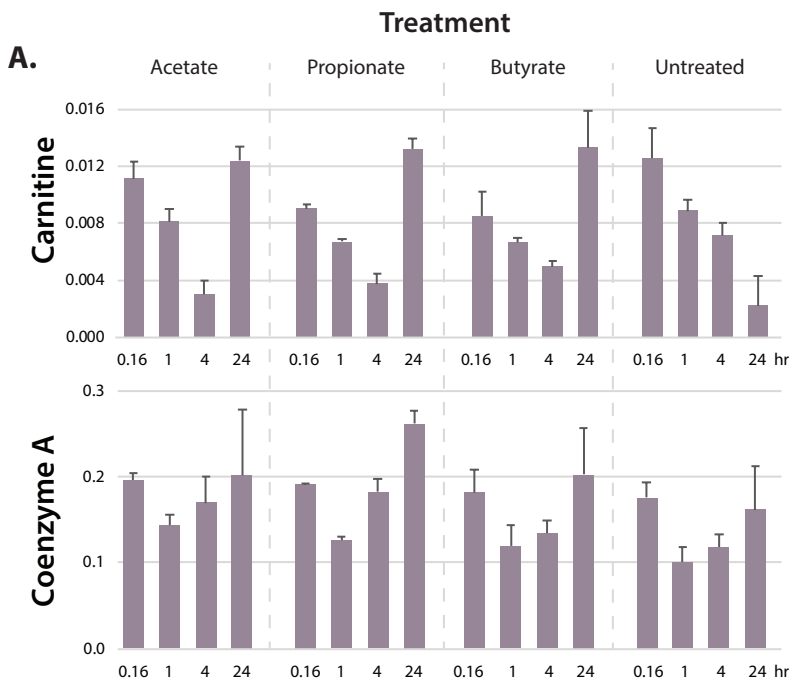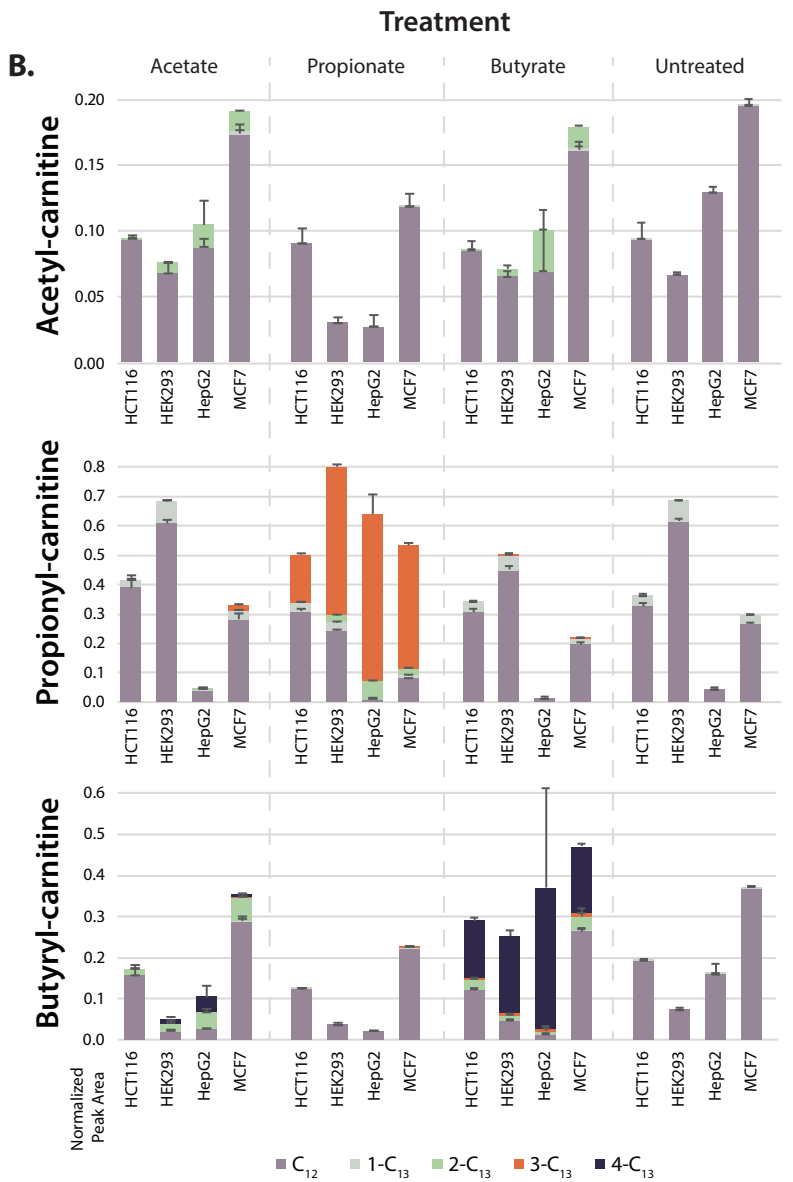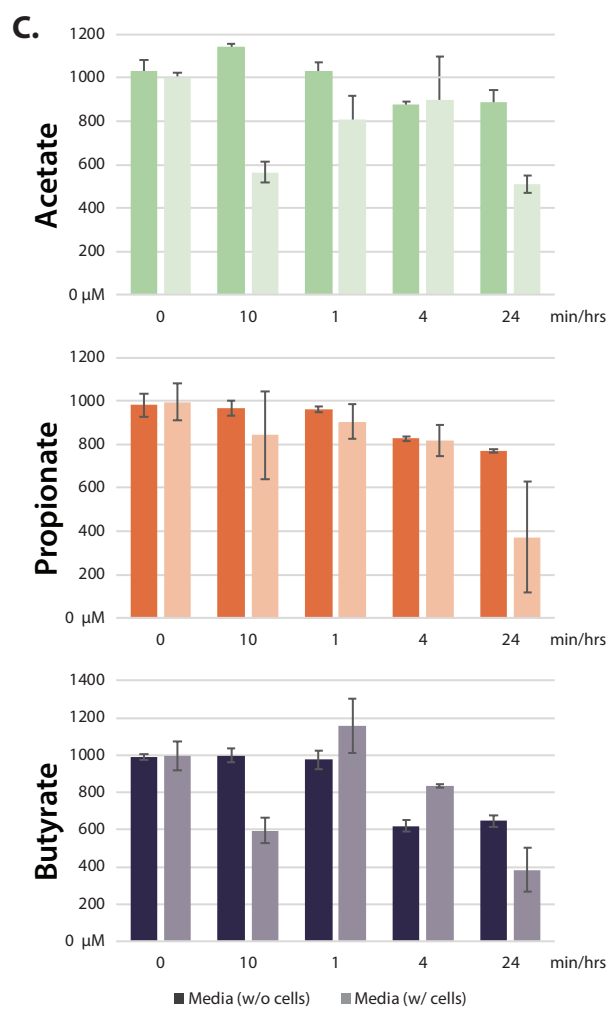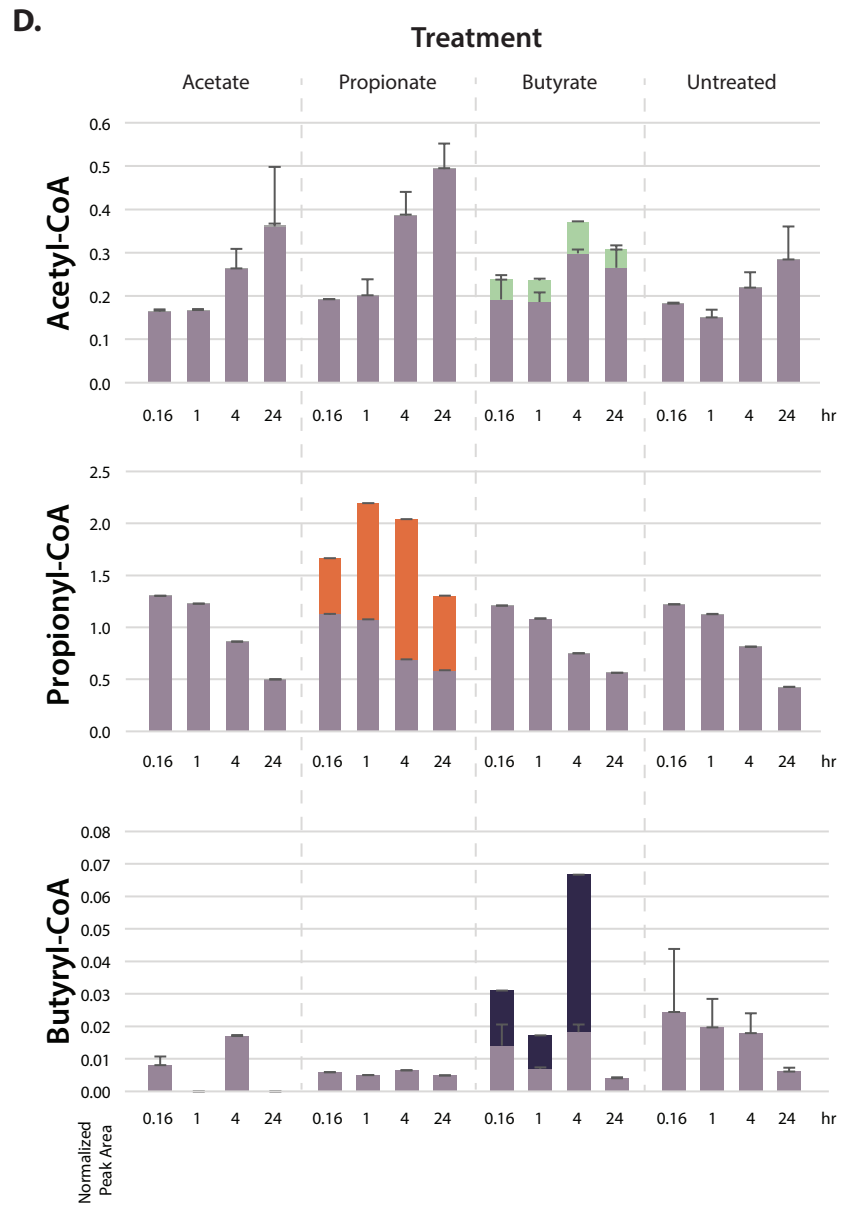

Supplement: supp [file elife-72171-supp-v1.zip]

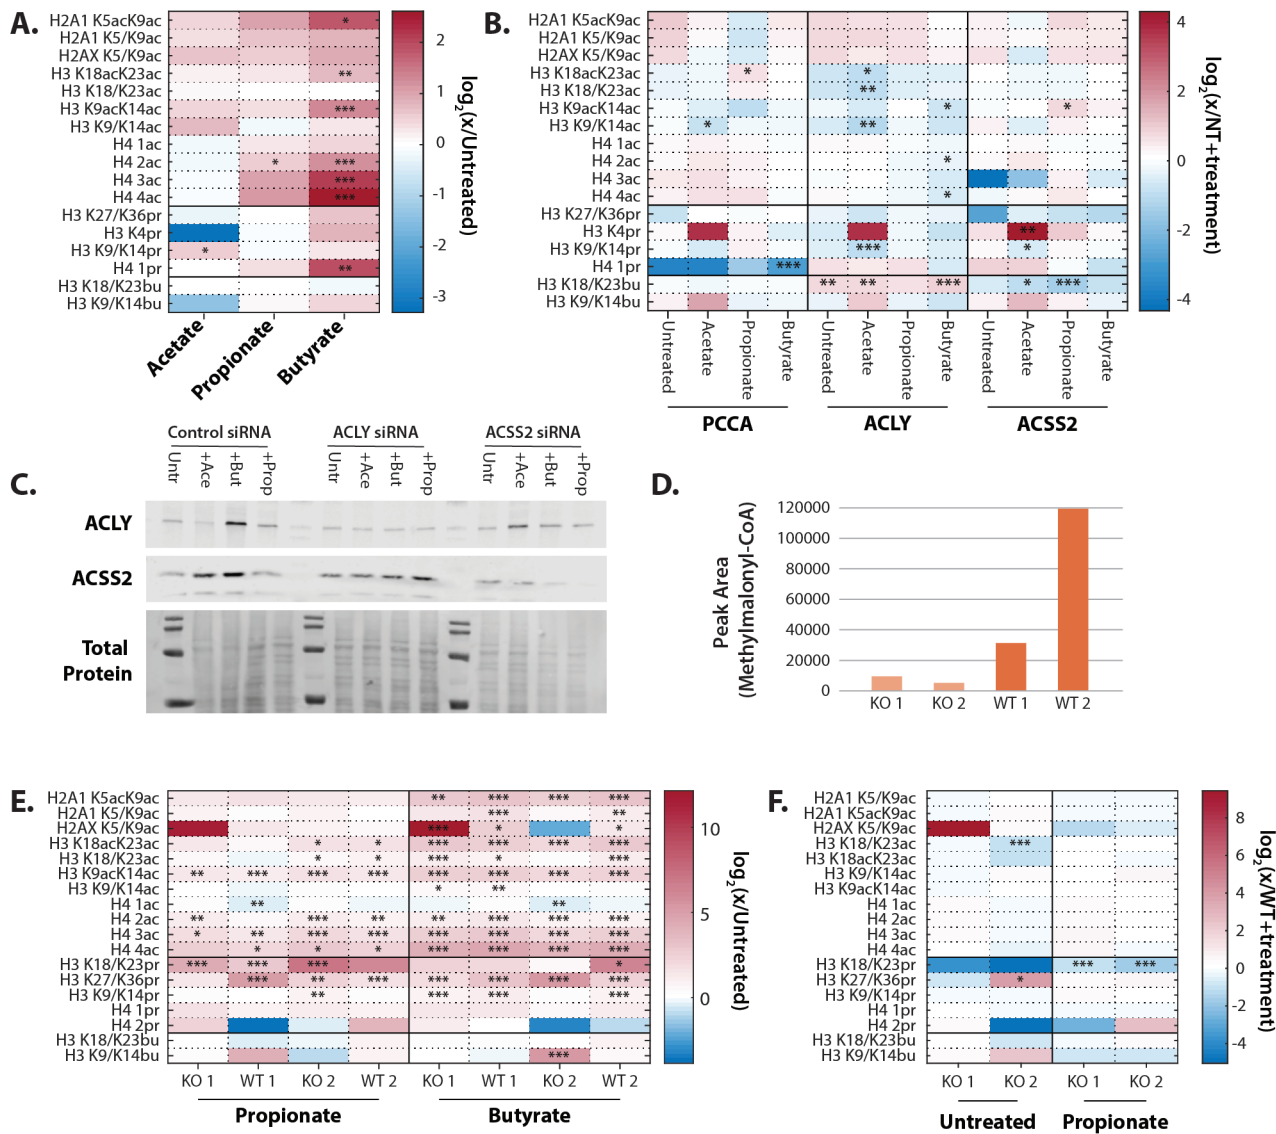

Supplement: supp [file elife-72171-supp-v1.zip]

**A.**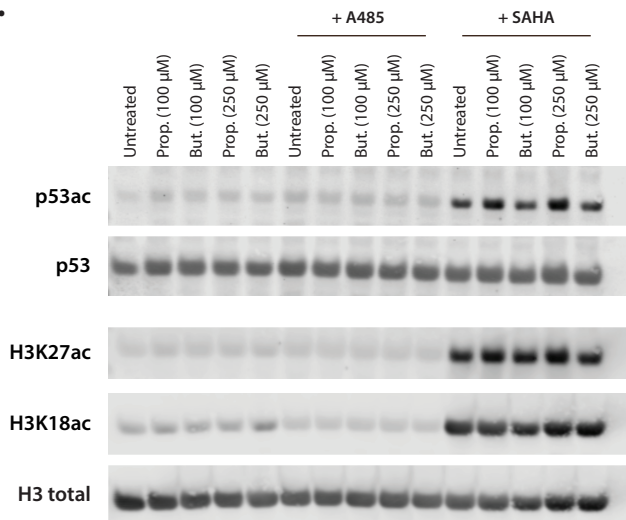**B.**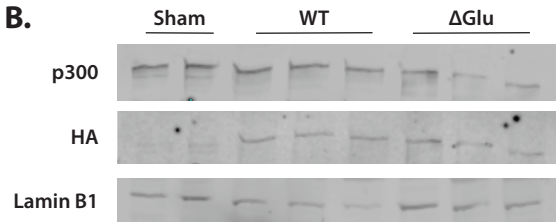**C.**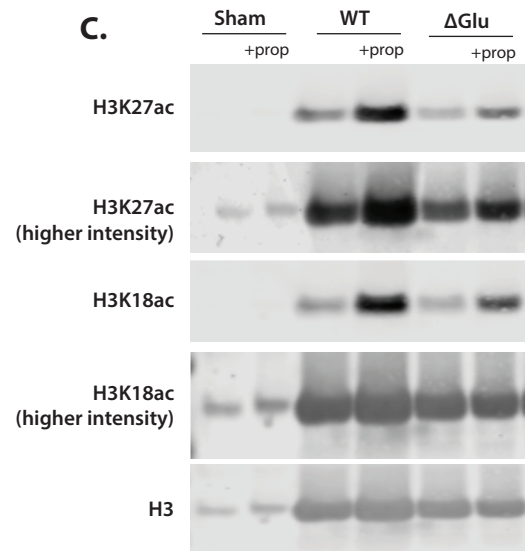**D.**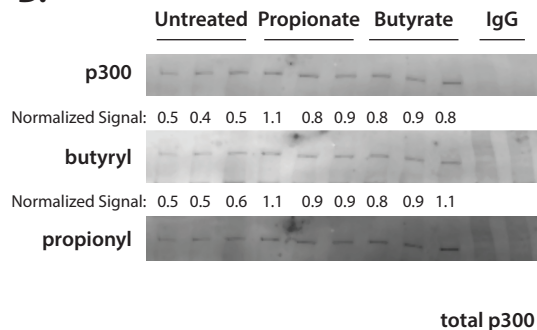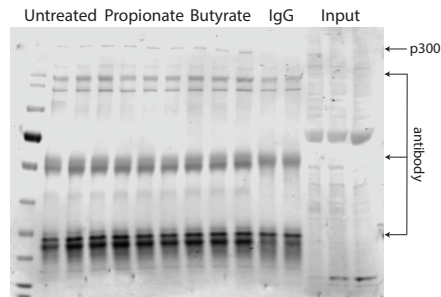

Supplement: supp [file elife-72171-supp-v1.zip]

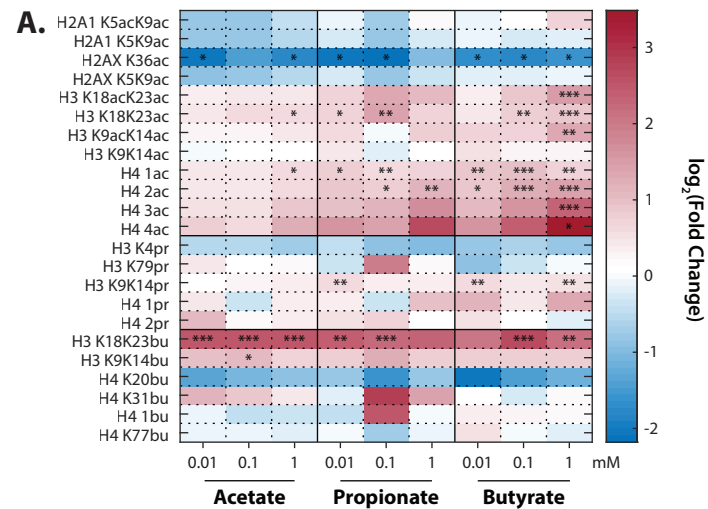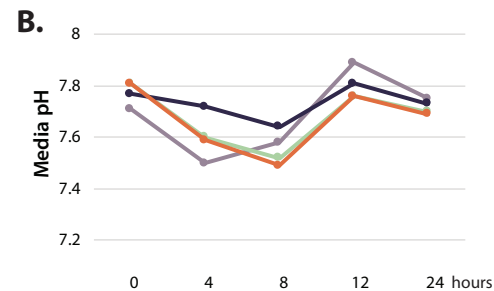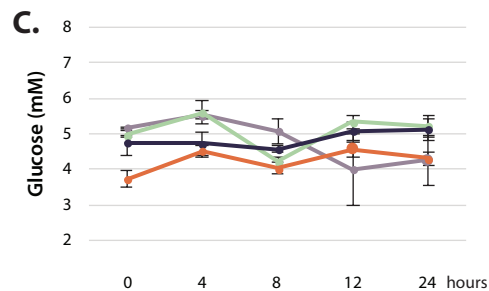

—●— Untreated —●— Acetate —●— Butyrate —●— Propionate

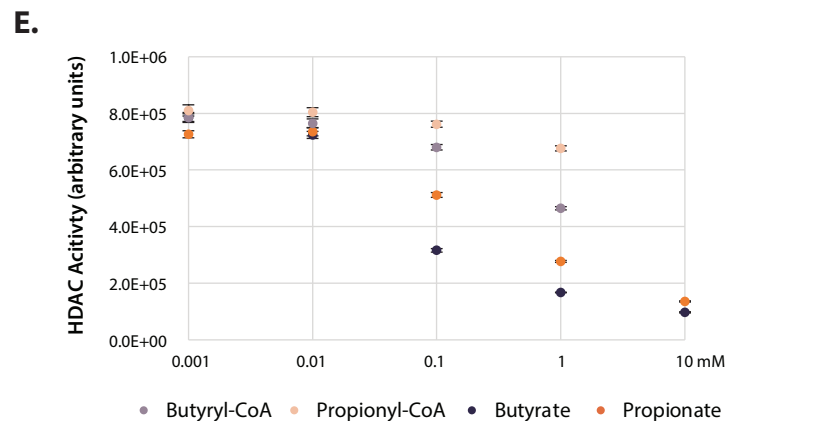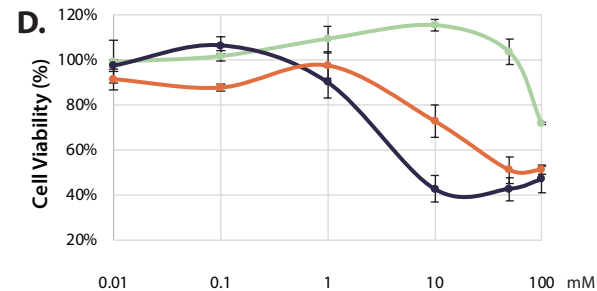

Supplement: supp [file elife-72171-supp-v1.zip › elife_poa_e72171_Figure_1_figure_supplement_1.pdf]
